# Supplementary material for: Particle size distributions of wildfire aerosols in the western USA
Source: Royal Society of Chemistry journal article supplement (doi:10.1039/d5ea00007f), 2025-01-01
Supplement: d5ea00007f1.pdf [file d5ea00007f1.pdf]

## **Supplementary material**

### **Particle Size Distributions of Wildfire Aerosols in the Western USA**

**Siying Lu<sup>1</sup>, Chiranjivi Bhattarai<sup>1</sup>, Vera Samburova<sup>1,2</sup>, Andrey Khlystov<sup>1,\*</sup>**

<sup>1</sup>Division of Atmospheric Sciences, Desert Research Institute, Reno, Nevada, USA;

<sup>2</sup>Department of Physics, University of Nevada, Reno, Nevada, USA

\*Corresponding author. Email address: [andrey.khlystov@dri.edu](mailto:andrey.khlystov@dri.edu) (A. Khlystov)

*Table S1 Information of wildfires with potential to impact Reno, NV during 2017, 2018, and 2020.*

| Fire name                  | Start day | End day   | Burned area (acres) | County                 | Location                                                                                          | Lat/Lon          | Ecosystem                                                                                                        | Corresponding Vegetation                                                                                                                                                                                                                                                                                                                                                                                                                                                     |
|----------------------------|-----------|-----------|---------------------|------------------------|---------------------------------------------------------------------------------------------------|------------------|------------------------------------------------------------------------------------------------------------------|------------------------------------------------------------------------------------------------------------------------------------------------------------------------------------------------------------------------------------------------------------------------------------------------------------------------------------------------------------------------------------------------------------------------------------------------------------------------------|
| Salmon August Complex Fire | 6/25/2017 | 12/8/2017 | 65,888              | Siskiyou, CA           | 14 miles west of Etna, California in the Marble Mountain Wilderness                               | 41.841, -123.474 | Klamath Subalpine; Marble/Salmon Mountains-Trinity Alps                                                          | Shasta red fir, mountain hemlock, western white pine, subalpine meadows, mixes of shrubs, herbs, and grasses, foxtail pine, Pacific silver fir; Douglas-fir, white fir, and red fir.                                                                                                                                                                                                                                                                                         |
| Whittier Fire              | 7/8/2017  | 10/5/2017 | 18,430              | Santa Barbara, CA      | In the Santa Ynez Mountains, Los Padres National Forest, south of Lake Cachuma, along Highway 154 | 34.567, -119.953 | Solomon-Purisima-Santa Ynez Hills; Western Transverse Range Lower Montane Shrub and Woodland                     | Coastal sage scrub, chaparral, oak woodland, grasslands; coast live oak, canyon oak, Coulter pine, California bay, bigcone Douglas-fir, chamise, ceanothus, manzanita, scrub oaks, cherry, and birchleaf mountain-mahogany                                                                                                                                                                                                                                                   |
| Garza Fire                 | 7/9/2017  | 1/9/2018  | 48,889              | King, CA               | Tar Canyon Road, near Avenal                                                                      | 35.933, -120.200 | Pleasant Valley/Kettleman Plain                                                                                  | Cropland, redstem filaree, soft chess, red brome, foxtail barley, and burclover.                                                                                                                                                                                                                                                                                                                                                                                             |
| Long Valley Fire           | 7/11/2017 | 7/21/2017 | 83,733              | Lassen, CA; Washoe, NV | Off Hwy 395 and Cowboy Joe Rd, 3 miles north of Doyle, CA and blew east towards Pyramid Lake      | 40.070, -120.140 | Lahontan and Tonopah Playas; Sierra Nevada-Influenced Semiarid Hills and Basins; Sierra Nevada-Influenced Ranges | Black greasewood, four-winged saltbush, and salt shrub community; antelope bitterbrush, desert peach, semiarid shrub community, and riparian cottonwood forest; pinyon-juniper woodland, ponderosa, lodgepole, Jeffrey, and western white pine                                                                                                                                                                                                                               |
| Chetco Bar Fire            | 7/12/2017 | 11/2/2017 | 191,125             | Curry, OR              | In the Kalmiopsis Wilderness near the Chetco River                                                | 42.297, -123.954 | Coastal Siskiyou; Serpentine Siskiyou; Southern Oregon Coastal Mountains                                         | Mixed conifer forest, Douglas-fir, ponderosa pine, Oregon white oak, California black oak, madrone, serviceberry, snowberry, Oregon grape, California fescue, and poison oak; Jeffrey pine, tanoak, incense cedar, chaparral composed of manzanita, ceanothus, Idaho fescue, and Lemmon needlegrass; Hemlock canopy, salal, sword fern, vine maple, rhododendron shrub, California bay-laurel, western redcedar, bigleaf maple, grand fir, red alder, salmonberry and oxalis |

Table S1 (Continued)

| Fire name               | Start day | End day    | Burned area (acres) | County                    | Location                                                                               | Lat/Lon          | Ecosystem                                                                                                     | Corresponding Vegetation                                                                                                                                                                                                                                                                                                                     |
|-------------------------|-----------|------------|---------------------|---------------------------|----------------------------------------------------------------------------------------|------------------|---------------------------------------------------------------------------------------------------------------|----------------------------------------------------------------------------------------------------------------------------------------------------------------------------------------------------------------------------------------------------------------------------------------------------------------------------------------------|
| Cold Springs Fire       | 7/14/2017 | 7/15/2017  | 1,523               | Washoe, NV                | Southwest of Clod Springs, NV                                                          |                  | Sierra Nevada-Influenced Semiarid Hills and Basins                                                            | Wyoming big sagebrush, antelope bitterbrush, desert peach, low sagebrush, Lahontan sagebrush, Douglas rabbitbrush, Nevada ephedra, bottlebrush squirreltail, desert needlegrass, Thurber needlegrass, Indian ricegrass, cheatgrass, bluebunch wheatgrass, Sandberg bluegrass, juniper, Riparian cottonwood woodland, buffaloberry.           |
| Detwiler Fire           | 7/16/2017 | 8/24/2017  | 81,826              | Mariposa, CA              | Detwiler Rd and Hunters Valley Rd, 2 miles east of Lake McClure                        | 37.617, -120.213 | Northern Sierran Foothills; Central Sierra Lower Montane Forests                                              | Needlegrass, annual grasslands, chamise, manzanita, interior live oak, ceanothus, blue oak, and foothill pine; Ponderosa pine, gray pine, mixed conifer forest, Montane hardwood forests, canyon live oak, black oak, shrubby tanoak, mixed chaparral, manzanita, ceanothus, and other shrubs                                                |
| Whitewater Fire         | 7/23/2017 | 11/21/2017 | 14,451              | Clackamas, OR; Marion, OR | In and near the Mount Jefferson Wilderness, approximately 13 miles east of Detroit, OR | 44.708, -121.856 | Western Cascades Lowlands and Valleys; Western Cascades Montane Highlands                                     | Douglas-fir, western hemlock, western redcedar, bigleaf maple, red alder, vine maple, salal, rhododendron, Oregon grape, huckleberry, thimbleberry, swordfern, oxalis, hazel, and blackberry; Pacific silver fir, mountain hemlock, noble fir, bigleaf maple, and Pacific yew                                                                |
| Preacher Fire           | 7/24/2017 | 7/29/2017  | 5,333               | Douglas, NV               | East of Highway 395 about 7 miles from the town of Gardnerville, NV                    |                  | Sierra Nevada-Influenced Semiarid Hills and Basins                                                            | Wyoming big sagebrush, antelope bitterbrush, desert peach, low sagebrush, Lahontan sagebrush, Douglas rabbitbrush, Nevada ephedra, bottlebrush squirreltail, desert needlegrass, Thurber needlegrass, Indian ricegrass, cheatgrass, bluebunch wheatgrass, Sandberg bluegrass, scattered juniper, Riparian cottonwood woodland, buffaloberry. |
| Modoc July Complex Fire | 7/24/2017 | 1/9/2018   | 83,120              | Modoc, CA                 | Throughout Modoc County                                                                |                  | Klamath Juniper Woodland/Devils Garden; Fremont Pine/Fir Forest; Adin/Horsehead Mountains Forest and Woodland | Western juniper, low sagebrush, mountain big sagebrush, bitterbrush, bunchgrasses, woolly mule-ears, Klamath plum, and birchleaf mountain-mahogany; Closed-canopy forests, Ponderosa pine, white fir, sugar pine, lodgepole pine, and incense cedar; Jeffrey pine, and other deciduous shrubs.                                               |

Table S1 (Continued)

| Fire name                  | Start day | End day    | Burned area (acres) | County                      | Location                                                                                                                                                                 | Lat/Lon          | Ecosystem                                                                                   | Corresponding Vegetation                                                                                                                                                                                                                                                                                                                                                                                                                                                                                                      |
|----------------------------|-----------|------------|---------------------|-----------------------------|--------------------------------------------------------------------------------------------------------------------------------------------------------------------------|------------------|---------------------------------------------------------------------------------------------|-------------------------------------------------------------------------------------------------------------------------------------------------------------------------------------------------------------------------------------------------------------------------------------------------------------------------------------------------------------------------------------------------------------------------------------------------------------------------------------------------------------------------------|
| Eclipse Complex Fire       | 7/25/2017 | 1/9/2018   | 100,000+            | Siskiyou, CA                | 5 miles W of Happy Camp<br>Happy Camp, CA, in the Siskiyou Mountains                                                                                                     | 41.841, -123.474 | Serpentine Siskiyou; Western Klamath Low Elevation Forests; Western Klamath Montane Forests | Jeffrey pine, endemic oak, ceanothus species, forbs, Douglas-fir, and western white pine; Port Orford cedar, tanoak, canyon live oak, red alder, white alder, mixed oak                                                                                                                                                                                                                                                                                                                                                       |
| High Cascades Complex Fire | 7/26/2017 | 11/30/2017 | 72,309              | Douglas, OR;<br>Jackson, OR | Crater Lake National Park, Rogue River-Siskiyou National Forest, Umpqua National Forest, and Fremont–Winema National Forest                                              | 42.935, -122.407 | High Southern Cascades Montane Forest; Cascades Subalpine/Alpine; Southern Cascades         | Mountain hemlock, lodgepole pine, Pacific silver fir, grand fir, white fir, Shasta red fir, woodrush, prince's pine, lupine, sidebells shinleaf, white bark pine, Shasta buckwheat, Newberry knotweed, and Brewer's sedge; alpine meadows, barren, Herbaceous and shrubby subalpine meadow, subalpine fir, Holm's sedge, black alpine sedge, tufted hairgrass, and alpine aster; Douglas-fir, ponderosa pine, incense cedar, sugar pine, snowberry, twinflower, Oregon grape, serviceberry, golden chinkapin, and oceanspray. |
| Orleans Complex Fire       | 7/26/2017 | 1/9/2018   | 27,276              | Siskiyou, CA                | About 18 miles northwest of Orleans, California in Siskiyou County                                                                                                       | 41.59, -123.501  | Western Klamath Low Elevation Forests                                                       | Douglas-fir, Port Orford cedar, tanoak, canyon live oak, red alder, white alder, mixed oak                                                                                                                                                                                                                                                                                                                                                                                                                                    |
| Minerva Fire               | 7/29/2017 | 8/17/2017  | 4,310               | Plumas, CA                  | Forest Road 24N26, 3 miles southwest of Quincy                                                                                                                           | 39.903, -120.976 | Northern Sierra Upper Montane Forests; Northern Sierra Mid-Montane Forests                  | Red fir, white fir, Jeffrey pine, sugar pine, incense cedar, lodgepole pine, quaking aspen, and montane chaparral; mixed conifer forest, Douglas-fir, ponderosa pine, black oak, tanoaks, and canyon live oak                                                                                                                                                                                                                                                                                                                 |
| Largo Fire                 | 7/30/2017 | 1/9/2018   | 236                 | El Dorado, CA               | South Shingle Rd at Michigan Bar Rd, northeast of Rancho Murieta                                                                                                         | 38.538, -121.039 | Northern Sierran Foothills                                                                  | Needlegrass, annual grasslands, chamise, manzanita, interior live oak, ceanothus, blue oak, and foothill pine.                                                                                                                                                                                                                                                                                                                                                                                                                |
| Devils Lake Fire           | 7/31/2017 | 8/10/2017  | 1,702               | Klamath, OR                 | Primarily on the Bly Ranger District, Fremont-Winema National Forest, but is moving south into more heavily-timbered terrain protected by Oregon Department of Forestry. |                  | Klamath Juniper Woodland                                                                    | Ponderosa pine, antelope bitterbrush, bunchgreasses, low sagebrush, Wyoming big sagebrush, Idaho fescue, bluebunch wheatgrass, Sandberg bluegrass, Western juniper, mountain-mahogany.                                                                                                                                                                                                                                                                                                                                        |

Table S1 (Continued)

| Fire name           | Start day | End day    | Burned area (acres) | County               | Location                                                                                                       | Lat/Lon          | Ecosystem                                      | Corresponding Vegetation                                                                                                                                                                                                                                                                                        |
|---------------------|-----------|------------|---------------------|----------------------|----------------------------------------------------------------------------------------------------------------|------------------|------------------------------------------------|-----------------------------------------------------------------------------------------------------------------------------------------------------------------------------------------------------------------------------------------------------------------------------------------------------------------|
| Summit Complex Fire | 7/31/2017 | 1/9/2018   | 5,247               | Stanislaus, CA       | The Summit Complex consists of 3 fires burning on the Summit Ranger District of the Stanislaus National Forest | 38.329, -119.782 | Central Sierra Mid-Montane Forests             | Mesic mixed conifer forest, Douglas-fir, ponderosa pine, canyon, live, and black oaks                                                                                                                                                                                                                           |
| Empire Fire         | 8/1/2017  | 11/27/2017 | 8,094               | Mariposa, CA         | East of Badger Pass Ski Area and next to Bridalveil Creek Campground in Yosemite National Park, CA             | 37.644, -119.618 | Southern Sierra Upper Montane Forests          | Mixed conifer, white fir, red fir forests, Jeffrey pine, lodgepole pine, montane chaparral                                                                                                                                                                                                                      |
| Cinder Butte Fire   | 8/2/2017  | 8/17/2017  | 52,531              | Lake, OR; Harney, OR | In the area east of Glass Buttes in northern Lake County and then spread into northwestern Harney County       | 43.578, -119.94  | Semiarid Uplands; High Lava Plains             | Mountain big sagebrush, low sagebrush, mountain-mahogany, Idaho fescue, Sandberg bluegrass, Nevada bluegrass, bluebunch wheatgrass, bottlebrush squirreltail, Thurber needlegrass, western juniper woodland, aspen, chokecherry, willows; Wyoming big sagebrush, silver sagebrush, creeping wildrye, mat muhley |
| Indian Fire         | 8/2/2017  | 1/9/2018   | 2,295               | Tulare, CA           | North of Jordan Hot Springs                                                                                    | 36.257, -118.296 | Southern Sierra Mid-Montane Forests            | Ponderosa pine forests, mixed conifer forest, Jeffrey pine, giant sequoia                                                                                                                                                                                                                                       |
| Parker 2 Fire       | 8/3/2017  | 8/28/2017  | 7,697               | Modoc, CA            | Southwest of Cedarville, in the Modoc National Forest                                                          | 41.466, -120.321 | Modoc Lava Flows and Buttes                    | Western juniper, big sagebrush, and native perennial grassland                                                                                                                                                                                                                                                  |
| Saw Fire            | 8/3/2017  | 1/9/2018   | 85                  | Humboldt, CA         | Off Alderpoint Rd & Lower Sawmill Rd, east of Garberville                                                      | 40.118, -123.761 | Outer North Coast Ranges                       | Douglas-fir, tanoak, Oregon white oak, needlegrass grasslands, redwood                                                                                                                                                                                                                                          |
| Calgary Fire        | 8/5/2017  | 8/8/2017   | 50                  | Kern, CA             | Old State Rd & Dollar Rd, Wofford Heights                                                                      | 35.706, -118.473 | Tehachapi Foothills                            | Blue oak, needlegrass, annual grasslands, chamise, ceanothus, mixed oaks, and foothill pine                                                                                                                                                                                                                     |
| Poslin Fire         | 8/6/2017  | 8/9/2017   | 859                 | Lassen, CA           | Scott Rd, 3 miles northeast of Scotts, 9 miles south of Doyle                                                  | 39.888, -120.066 | Northeastern Sierra Mixed Conifer-Pine Forests | Jeffrey, ponderosa, sugar pines, incense cedar, California white fir, sagebrush, antelope bitterbrush, snowbrush and manzanita                                                                                                                                                                                  |
| Falcon Complex Fire | 8/8/2017  | 9/15/2017  | 2,935               | Douglas, OR          | Umpqua National Forest                                                                                         |                  | Western Cascades Lowlands and Valleys          | Douglas-fir, western hemlock, western redcedar, bigleaf maple, red alder, vine maple, salal, rhododendron, Oregon grape, huckleberry, thimbleberry, swordfern, oxalis, hazel, and blackberry                                                                                                                    |

Table S1 (Continued)

| Fire name                 | Start day | End day    | Burned area (acres) | County        | Location                                                                                         | Lat/Lon          | Ecosystem                                                                                     | Corresponding Vegetation                                                                                                                                                                                                                                                                                                                                                                                                                                                                            |
|---------------------------|-----------|------------|---------------------|---------------|--------------------------------------------------------------------------------------------------|------------------|-----------------------------------------------------------------------------------------------|-----------------------------------------------------------------------------------------------------------------------------------------------------------------------------------------------------------------------------------------------------------------------------------------------------------------------------------------------------------------------------------------------------------------------------------------------------------------------------------------------------|
| Nena Springs Fire         | 8/8/2017  | 8/29/2017  | 68,135              | Jefferson, OR | 14 miles north of Madras                                                                         |                  | John Day/Clarno Uplands; Deschutes River Valley; Deschutes/John Day Canyons; Umatilla Plateau | Bluebunch wheatgrass, Idaho fescue, basin wildrye, Wyoming big sagebrush, Thurber needlegrass, Western juniper woodland, ponderosa pine forest, white alder, mockorange, chokecherry, clematis, willows, black cottonwood, water birch; Antelope bitterbrush, basin big sagebrush, mountain big sagebrush, needleandthread, black hawthorn, juniper, Himalayan blackberry, reed canarygrass, and sweet clover; Sandberg bluegrass, cheatgrass, western clematis; stiff sagebrush, alien cheatgrass. |
| Staley                    | 8/10/2017 | 10/31/2017 | 2,300               | Lane, OR      | In Willamette National Forest                                                                    |                  | Western Cascades Montane Highlands                                                            | Pacific silver fir, western hemlock, mountain hemlock, Douglas-fir, noble fir, bigleaf maple, red alder, Pacific yew, vine maple, rhododendron, Oregon grape, huckleberry, and thimbleberry                                                                                                                                                                                                                                                                                                         |
| Jones Fire                | 8/10/2017 | 11/29/2017 | 10,114              | Lane, OR      | In Willamette National Forest, approximately 10 miles northeast of Lowell                        | 44.003, -122.575 |                                                                                               |                                                                                                                                                                                                                                                                                                                                                                                                                                                                                                     |
| Milli Fire                | 8/11/2017 | 9/24/2017  | 24,079              | Deschutes, OR | Deschutes National Forest                                                                        | 44.257, -121.743 | Ponderosa Pine/Bitterbrush Woodland                                                           | Ponderosa pine, antelope bitterbrush, greenleaf manzanita, snowberry, mountain alder, stream dogwood, willows, and sedges.                                                                                                                                                                                                                                                                                                                                                                          |
| Umpqua North Complex Fire | 8/11/2017 | 10/30/2017 | 43,158              | Douglas, OR   | Along Oregon Highway 138 east of Roseburg and in the northern part of the Umpqua National Forest |                  | Western Cascades Lowlands and Valleys; Western Cascades Montane Highlands                     | Douglas-fir, western hemlock, western redcedar, bigleaf maple, red alder, vine maple, salal, rhododendron, Oregon grape, huckleberry, thimbleberry, swordfern, oxalis, hazel, and blackberry; Pacific silver fir, mountain hemlock, noble fir, bigleaf maple, Pacific yew.                                                                                                                                                                                                                          |
| Horse Prairie Fire        | 8/26/2017 | 9/29/2017  | 16,436              | Douglas, OR   | Southwest of Roseburg, 12 miles west of Riddle and 8 miles southeast of Camas Valley             |                  | Inland Siskiyou                                                                               | Douglas-fir, ponderosa pine, Oregon white oak, California black oak, madrone, serviceberry, snowberry, Oregon grape, California fescue, and poison oak.                                                                                                                                                                                                                                                                                                                                             |

Table S1 (Continued)

| Fire name      | Start day | End day    | Burned area (acres) | County        | Location                                          | Lat/Lon          | Ecosystem                                                                                                                                                 | Corresponding Vegetation                                                                                                                                                                                                                                                                                                                                   |
|----------------|-----------|------------|---------------------|---------------|---------------------------------------------------|------------------|-----------------------------------------------------------------------------------------------------------------------------------------------------------|------------------------------------------------------------------------------------------------------------------------------------------------------------------------------------------------------------------------------------------------------------------------------------------------------------------------------------------------------------|
| Tungsten Fire  | 8/27/2017 | 9/14/2017  | 22,000              | Churchill, NV | 60 miles east of Fallon, NV                       | 39.731, -117.725 | Central Nevada Mid-Slope Woodland and Brushland                                                                                                           | Singleleaf pinyon, Utah juniper, black sagebrush, Wyoming big sagebrush, green ephedra, rabbitbrush, desert bitterbrush, Thurber needlegrass, Sandberg bluegrass, bluebunch wheatgrass, Idaho fescue, cheatgrass, mountain big sagebrush, curleaf mountain-mahogany, cottonwood, aspen, water birch, chokecherry, and coyote willow.                       |
| Mud Fire       | 8/29/2017 | 9/1/2017   | 6,042               | Lassen, CA    | Little Mud Flat, 18 miles northeast of Susanville | 40.440, -120.222 | High Lava Plains                                                                                                                                          | Wyoming big sagebrush, Bluebunch wheatgrass, cheatgrass                                                                                                                                                                                                                                                                                                    |
| Tohakum 2 Fire | 8/29/2017 | 9/7/2017   | 94,221              | Washoe, NV    | Tohakum Peak northeast of Pyramid Lake            |                  | Lahontan Uplands; Lahontan Sagebrush Slopes                                                                                                               | Utah juniper, Singleleaf pinyon, mountain big sagebrush, Wyoming big sagebrush, black sagebrush, low sagebrush, green ephedra, antelope bitterbrush, rabbitbrush, Sandberg bluegrass, Thurber needlegrass, and bluebunch wheatgrass, Indian ricegrass; Lahontan sagebrush, littleleaf horsebrush, desert needlegrass, bottlebrush squirreltail, cheatgrass |
| Slinkard Fire  | 8/29/2017 | 9/12/2017  | 8,925               | Mono, CA      | West of Hwy 395, north of Hwy 89, south of Topaz  | 38.655, -119.554 | Sierra Nevada-Influenced Ranges; Northeastern Sierra Mixed Conifer-Pine Forests; Sierra Nevada-Influenced Semiarid Hills and Basins                       | Pinyon-juniper woodland, ponderosa, lodgepole, Jeffrey, and western white pine; sugar pines, incense cedar, California white fir, sagebrush, antelope bitterbrush, snowbrush and manzanita; desert peach, semiarid shrub, riparian cottonwood forest, grazing, agriculture, and invasive weeds                                                             |
| Pier Fire      | 8/29/2017 | 11/29/2017 | 36,556              | Tulare, CA    | Highway 190, east of Springville                  | 36.153, -118.741 | Southern Sierran Foothills; Southern Sierra Lower Montane Forest and Woodland; Southern Sierra Mid-Montane Forests; Southern Sierra Upper Montane Forests | Blue oak, needlegrass and annual grasslands, chamise, ceanothus, mixed oaks, and foothill pine; chaparral, ponderosa pine; mixed conifer forest, Jeffrey pine, giant sequoia grove; white fir, red fir forests, lodgepole pine, montane chaparral                                                                                                          |

Table S1 (Continued)

| Fire name           | Start day | End day    | Burned area (acres) | County               | Location                                                                | Lat/Lon          | Ecosystem                                                                                                                             | Corresponding Vegetation                                                                                                                                                                                                                                                                              |
|---------------------|-----------|------------|---------------------|----------------------|-------------------------------------------------------------------------|------------------|---------------------------------------------------------------------------------------------------------------------------------------|-------------------------------------------------------------------------------------------------------------------------------------------------------------------------------------------------------------------------------------------------------------------------------------------------------|
| Helena-Fork Fire    | 8/30/2017 | 11/15/2017 | 21,846              | Trinity, CA          | Hwy 299 near town of Helena, Junction City                              | 40.760, -123.100 | Eastern Klamath Low Elevation Forests; Eastern Klamath Montane Forests; Marble/Salmon Mountains-Trinity Alps                          | Douglas-fir, ponderosa pine, canyon live oak, knobcone pine, chaparral of chamise, deer brush, and manzanita, streams, cottonwoods, white alder, and willows; White fir, incense cedar, sugar pine, mountain dogwood, Shasta fir, red fir, Black oak, conifers, huckleberry oak                       |
| R-4 Fire            | 8/30/2017 | 1/9/2018   | 18,618              | Lassen, CA           | 23 miles east-southeast of Madeline                                     | 40.696, -119.935 | High Lava Plains                                                                                                                      | Bluebunch wheatgrass, Wyoming big sagebrush, cheatgrass, sagebrush                                                                                                                                                                                                                                    |
| Buck Fire           | 9/12/2017 | 11/20/2017 | 13,417              | Trinity, CA          | Black Rock Mountain, North Portion of Yolla Bolly Wilderness            | 40.227, -123.036 | High North Coast Ranges                                                                                                               | Mixed conifer, Douglas-fir forests, tanoak, White fir forest, red fir                                                                                                                                                                                                                                 |
| Cascade Fire        | 10/8/2017 | 10/19/2017 | 9,989               | Yuba, CA             | Cascade Way and Marysville Rd, north of Collins Lake                    | 39.322, -121.402 | Northern Sierran Foothills                                                                                                            | Needlegrass, annual grasslands, chamise, manzanita, interior live oak, ceanothus, blue oak, and foothill pine                                                                                                                                                                                         |
| Redwood Valley Fire | 10/8/2017 | 10/28/2017 | 36,523              | Mendocino, CA        | North of Hwy 20, west of Mendocino National Forest, south of Black Bart | 39.249, -123.166 | Coastal Franciscan Redwood Forest; Outer North Coast Ranges; Napa-Sonoma-Russian River Valleys                                        | Multi-story canopy of redwood, Douglas-fir, tanoak, bigleaf maple, evergreen shrubs, various grasses, coast live oaks, and grassland savannas; Oregon white oak, redwood; Grape vineyards, orchards, specialty crops                                                                                  |
| Tubbs Fire          | 10/8/2017 | 10/31/2017 | 36,807              | Napa, CA; Sonoma, CA | Off of Hwy 128 and Bennett Ln, Calistoga                                | 38.609, -122.629 | Napa-Sonoma-Lake Volcanic Highlands; Napa-Sonoma-Russian River Valleys; Mayacmas Mountains                                            | Mixed chaparral, mixed hardwoods (including coast live oak, madrone, and California bay), Douglas-fir or pines, cypress; Grape vineyards, orchards, specialty crops; Annual grasslands, montane hardwoods, blue oak woodland, Sargent or McNab cypress                                                |
| Atlas Fire          | 10/8/2017 | 10/28/2017 | 51,057              | Napa, CA             | North of the city of Napa, near Napa Soda Springs                       | 38.392, -122.243 | Napa-Sonoma-Lake Volcanic Highlands; Napa-Sonoma-Russian River Valleys; North Coast Range Eastern Slopes; Foothill Ridges and Valleys | Mixed chaparral, mixed hardwoods (including coast live oak, madrone, and California bay), Douglas-fir or pines, cypress; Grape vineyards, orchards, specialty crops; leather oak, chamise, mixed conifer, McNab or Sargent cypress, foothill and knobcone pine, blue oak woodland; purple needlegrass |



Table S1 (Continued)

| Fire name     | Start day  | End day    | Burned area (acres) | County                   | Location                                                                       | Lat/Lon          | Ecosystem                                                                                                                                                                        | Corresponding Vegetation                                                                                                                                                                                                                                                                                                                                                                                                                                                                                                                                                                                                                                                                                   |
|---------------|------------|------------|---------------------|--------------------------|--------------------------------------------------------------------------------|------------------|----------------------------------------------------------------------------------------------------------------------------------------------------------------------------------|------------------------------------------------------------------------------------------------------------------------------------------------------------------------------------------------------------------------------------------------------------------------------------------------------------------------------------------------------------------------------------------------------------------------------------------------------------------------------------------------------------------------------------------------------------------------------------------------------------------------------------------------------------------------------------------------------------|
| LaPorte Fire  | 10/9/2017  | 10/19/2017 | 6,151               | Butte, CA                | La Porte Rd and Oro Bangor Hwy, Bangor                                         | 39.394, -121.406 | Northern Terraces                                                                                                                                                                | Annual grass, forbs, blue oak woodlands                                                                                                                                                                                                                                                                                                                                                                                                                                                                                                                                                                                                                                                                    |
| Pocket Fire   | 10/9/2017  | 10/31/2017 | 17,357              | Sonoma, CA               | Off of Pocket Ranch Rd and Ridge Ranch Rd, Geyserville                         | 38.765, -122.909 | Mayacmas Mountains                                                                                                                                                               | Annual grasslands, montane hardwoods, mixed chaparral, blue oak woodland, Sargent or McNab cypress, Douglas-fir                                                                                                                                                                                                                                                                                                                                                                                                                                                                                                                                                                                            |
| Oakmont Fire  | 10/14/2017 | 4/5/2018   | 100                 | Sonoma, CA               | East side of Highway 12 near the Oakmont community                             | 38.461, -122.581 | Napa-Sonoma-Russian River Valleys                                                                                                                                                | Grape vineyards, orchards, specialty crops.                                                                                                                                                                                                                                                                                                                                                                                                                                                                                                                                                                                                                                                                |
| Lions Fire    | 6/11/2018  | 10/1/2018  | 13,347              | Madera, CA               | Near the Lion Point area in the Ansel Adams Wilderness                         | 37.571, -119.118 | Southern Sierra Mid-Montane Forests; Southern Sierra Upper Montane Forests; Southern Sierra Lower Montane Forest and Woodland; Sierran Alpine; Southern Sierra Subalpine Forests | Ponderosa pine forests, mixed conifer forest, Jeffrey pine, giant sequoia, white fir, red fir forests, lodgepole pine, montane chaparral, oak, chaparral, Cushion plants, tufted grasses, alpine willows, sedges, various shrubs, herbaceous plants, mountain hemlock, whitebark pine, western white pine, foxtail pine, and limber pine                                                                                                                                                                                                                                                                                                                                                                   |
| Ferguson Fire | 7/13/2018  | 8/19/2018  | 96,901              | Mariposa, CA             | Highway 140 and Hite Cove, near El Portal                                      | 37.655, -119.886 | Southern Sierra Mid-Montane Forests; Southern Sierra Upper Montane Forests; Central Sierra Lower Montane Forests                                                                 | Ponderosa pine forests, mixed conifer forest, Jeffrey pine, giant sequoia, white fir, red fir forests, lodgepole pine, montane chaparral, gray pine, montane hardwood forests, canyon live oak, interior live oak, black oak, shrubby tanoak, manzanita, chamise, ceanothus, and other shrubs.                                                                                                                                                                                                                                                                                                                                                                                                             |
| Miles Fire    | 7/15/2018  | 9/3/2018   | 54,334              | Jackson, OR; Douglas, OR | Umpqua National Forest, Crater Lake National Park, Rogue River National Forest | 42.848, -122.711 | Western Cascades Lowlands and Valleys; Western Cascades Montane Highlands; High Southern Cascades Montane Forest; Cascades Subalpine/Alpine; Southern Cascades                   | Douglas-fir, western hemlock, western redcedar, bigleaf maple, red alder, vine maple, salal, rhododendron, Oregon grape, huckleberry, thimbleberry, swordfern, oxalis, hazel, and blackberry; Pacific silver fir, mountain hemlock, noble fir, Pacific yew; lodgepole pine; grand fir, white fir, Shasta red fir, woodrush, prince's pine, lupine, sidebells shinleaf, whitebark pine, Shasta buckwheat, Newberry knotweed, and Brewer's sedge; Herbaceous and shrubby subalpine meadow vegetation, subalpine fir, Holm's sedge, black alpine sedge, tufted hairgrass, and alpine aster; ponderosa pine, incense cedar, sugar pine, snowberry, twinflower, serviceberry, golden chinkapin, and oceanspray. |

Table S1 (Continued)

| Fire name           | Start day | End day    | Burned area (acres) | County        | Location                                                        | Lat/Lon          | Ecosystem                                                                                         | Corresponding Vegetation                                                                                                                                                                                                                                                                                                                                                                                                     |
|---------------------|-----------|------------|---------------------|---------------|-----------------------------------------------------------------|------------------|---------------------------------------------------------------------------------------------------|------------------------------------------------------------------------------------------------------------------------------------------------------------------------------------------------------------------------------------------------------------------------------------------------------------------------------------------------------------------------------------------------------------------------------|
| Garner Complex Fire | 7/15/2018 | 8/14/2018  | 8,886               | Josephine, OR | From west of Grants Pass toward northeast                       | 42.556, -123.380 | Oak Savanna Foothills; Rogue/Illinois Valleys; Inland Siskiyou; Serpentine Siskiyou               | Oregon white oak, California black oak woodlands, madrone, ponderosa pine, grassland savanna, Douglas-fir, incense cedar, oceanspray, poison oak, snowberry, Idaho fescue, California brome, roughstalk bluegrass, ceanothus; grassland, California fescue, serviceberry, willow and cottonwood; Oregon grape; Jeffrey pine, tanoak, chaparral, manzanita, and Lemmon needlegrass                                            |
| Timber Crater 6     | 7/15/2018 | 8/16/2018  | 3,126               | Klamath, OR   | 20 miles SW of Chemult, OR, and on the northeast of Crater Lake | 43.073, -112.039 | Pumice Plateau; High Southern Cascades Montane Forest; Pumice Plateau Basins                      | Lodgepole pine, ponderosa pine, white fir, antelope bitterbrush, Idaho fescue, mountain alder, stream dogwood, willow, quaking aspen, mountain hemlock, lodgepole pine, Pacific silver fir, grand fir, white fir, Shasta red fir, woodrush, prince's pine, lupine, sidebells shinleaf, white bark pine, Shasta buckwheat, Newberry knotweed, Brewer's sedge, aspen, and wetland vegetation                                   |
| Taylor Creek Fire   | 7/15/2018 | 10/1/2018  | 52,839              | Josephine, OR | the west of Merlin                                              | 42.528, -123.571 | Rogue/Illinois Valleys; Oak Savanna Foothills; Serpentine Siskiyou; Inland Siskiyou               | Oregon white oak, madrone, California black oak, ponderosa pine, grasslands, California fescue, snowberry, serviceberry, willow and cottonwood; madrone, grassland savanna, Douglas-fir, incense cedar, oceanspray, poison oak, Idaho fescue, California brome, roughstalk bluegrass, and ceanothus; Jeffrey pine, tanoak, chaparral composed of manzanita, ceanothus, and Lemmon needlegrass; Oregon grape, and poison oak. |
| Natchez Fire        | 7/15/2018 | 10/30/2018 | 38,134              | Siskiyou, CA  | Southeast of Cave Junction, OR                                  | 41.951, -123.546 | Border High-Siskiyou; Western Klamath Low Elevation Forests; Serpentine Siskiyou; Inland Siskiyou | White fir forests, red fir forests, Jeffrey pine, Douglas-fir, Port Orford cedar, tanoak, canyon live oak, red and white alder, mixed oak, incense cedar, manzanita, ceanothus, Idaho fescue, Lemmon needlegrass, ponderosa pine, Oregon white oak, California black oak, madrone, serviceberry, snowberry, Oregon grape, California fescue, and poison oak                                                                  |

Table S1 (Continued)

| Fire name     | Start day | End day    | Burned area (acres) | County                  | Location                                                                  | Lat/Lon          | Ecosystem                                                                                                                                 | Corresponding Vegetation                                                                                                                                                                                                                                                                                                                                                                                                                                                                                                                                                                                                                                                                                                                                                                                                                                                       |
|---------------|-----------|------------|---------------------|-------------------------|---------------------------------------------------------------------------|------------------|-------------------------------------------------------------------------------------------------------------------------------------------|--------------------------------------------------------------------------------------------------------------------------------------------------------------------------------------------------------------------------------------------------------------------------------------------------------------------------------------------------------------------------------------------------------------------------------------------------------------------------------------------------------------------------------------------------------------------------------------------------------------------------------------------------------------------------------------------------------------------------------------------------------------------------------------------------------------------------------------------------------------------------------|
| Klondike Fire | 7/15/2018 | 11/16/2018 | 175,258             | Josephine, OR           | Siskiyou National Forest, southwest of Grants Pass, 9 miles west of Selma | 42.369, -123.860 | Serpentine Siskiyou; Inland Siskiyou; Oak Savanna Foothills; Rogue/Illinois Valleys                                                       | Jeffrey pine, tanoak, incense cedar, manzanita, ceanothus, Idaho fescue, Lemmon needlegrass, ponderosa pine, Oregon white oak, California black oak, madrone, serviceberry, snowberry, Oregon grape, California fescue, poison oak, Douglas-fir Forest, grassland savanna, oceanspray, California brome, roughstalk bluegrass, grasslands, willow, and cottonwood                                                                                                                                                                                                                                                                                                                                                                                                                                                                                                              |
| Carr Fire     | 7/23/2018 | 8/30/2018  | 92,936              | Shasta, CA; Trinity, CA | Hwy 299 and Carr Powerhouse Rd, Whiskeytown                               | 40.654, -122.623 | Eastern Klamath Low Elevation Forests; Eastern Klamath Montane Forests; Foothill Ridges and Valleys; Tehama Terraces                      | Douglas-fir, ponderosa pine, canyon live oak, knobcone pine, chaparral, chamise, deer brush, manzanita, cottonwoods, white alder, willows, white fir, incense cedar, sugar pine, mountain dogwood, Shasta fir, red fir, black oak, conifers, huckleberry oak, purple needlegrass, blue oak, foothill pine, needlegrass                                                                                                                                                                                                                                                                                                                                                                                                                                                                                                                                                         |
| Perry Fire    | 7/27/2018 | 8/5/2018   | 51,400              | Washoe, NV              | Southwest of Pyramid Lake, NV                                             |                  | Sierra Nevada-Influenced Semiarid Hills and Basins; Sierra Nevada-Influenced Ranges; Lahontan Sagebrush Slopes; Lahontan Salt Shrub Basin | Wyoming big sagebrush, antelope bitterbrush, desert peach, low sagebrush, Lahontan sagebrush, Douglas rabbitbrush, Nevada ephedra, bottlebrush squirreltail, desert needlegrass, Thurber needlegrass, Indian ricegrass, cheatgrass, bluebunch wheatgrass, Sandberg bluegrass, juniper, Riparian cottonwood woodland, buffaloberry, Singleleaf pinyon, Utah juniper, mountain big sagebrush, desert bitterbrush, green ephedra, currant, mountain brush, white fir, ponderosa pine, lodgepole pine, Jeffrey pine, western white pine, whitebark pine, littleleaf horsebrush, rabbitbrush, grasses, Shadscale, bud sagebrush, Bailey greasewood, Shockley desert thorn, Nevada cohedra, black greasewood, inland saltgrass, alkali sacaton, seepweed, indigobush, four-wing saltbush, dune horsebrush, Fremont cottonwood, coyote willow, silver buffaloberry, and Russian olive |

Table S1 (Continued)

| Fire name              | Start day | End day    | Burned area (acres) | County                                         | Location                                                                                 | Lat/Lon          | Ecosystem                                                                                                                                       | Corresponding Vegetation                                                                                                                                                                                                                                                                     |
|------------------------|-----------|------------|---------------------|------------------------------------------------|------------------------------------------------------------------------------------------|------------------|-------------------------------------------------------------------------------------------------------------------------------------------------|----------------------------------------------------------------------------------------------------------------------------------------------------------------------------------------------------------------------------------------------------------------------------------------------|
| Whaleback Fire         | 7/27/2018 | 8/7/2018   | 18,703              | Lassen, CA                                     | Off Whaleback Mountain and Antelope Valley Road, West of Spaulding, west of Eagle Lake   | 40.633, -120.868 | Modoc/Lassen Juniper-Shrub Hills and Mountains; California Cascades Eastside Conifer Forest; Low Southern Cascades Mixed Conifer Forest         | Western juniper, big sagebrush, perennial bunchgrasses, Jeffrey pine, ponderosa pine, white fir, sagebrush, mixed conifer, western hemlock, western redcedar, incense cedar, Shasta red fir, manzanita, ceanothus, Curl-leaf mountain-mahogany, and antelope bitterbrush                     |
| Mendocino Complex Fire | 7/27/2018 | 9/18/2018  | 459,123             | Mendocino, CA; Lake, CA; Colusa, CA; Glenn, CA | Off Highway 20 near Potter Valley, northeast of Ukiah, north and southwest of Clear Lake | 39.243, -123.103 | Outer North Coast Ranges; North Coast Range Eastern Slopes; Clear Lake Hills and Valleys; Mayacmas Mountains; High North Coast Ranges           | Tanoak, Oregon white oak, needlegrass grasslands, redwood, leather oak, chamise, mixed conifer, McNab or Sargent cypress, knobcone pine, blue oak woodland, cropland, orchards, vineyards, chaparral, annual grassland, montane hardwood, Douglas-fir forests, white fir forest, and red fir |
| Donnell Fire           | 8/1/2018  | 11/28/2018 | 36,450              | Tuolumne, CA                                   | Near Hwy 108, Donnell Lake area in the Carson Iceburg Wilderness                         | 38.349, -119.929 | Northern Sierra Upper Montane Forests; Northern Sierra Subalpine Forests; Central Sierra Mid-Montane Forests; Southern Sierra Subalpine Forests | Conifers, red fir, white fir, Jeffrey pine, sugar pine, incense cedar, lodgepole pine, quaking aspen, montane chaparral, whitebark pine, western white pine, mountain hemlock, mixed conifer forest, Douglas-fir, ponderosa pine, canyon live oak, black oak, foxtail pine, and limber pine  |
| Wagner Fire            | 8/4/2018  | 8/7/2018   | 22                  | Mariposa, CA                                   | Texas Hill Rd and Bondurant Mine Rd, east of Coulterville                                | 37.699, -120.054 | Central Sierra Lower Montane Forests; Southern Sierra Mid-Montane Forests                                                                       | Gray pine, mixed conifer forest, Montane hardwood forests, canyon live oak, interior live oak, black oak, shrubby tanoak, mixed chaparral, manzanita, chamise, ceanothus, other shrubs, ponderosa pine forests, Jeffrey pine, and giant sequoia                                              |
| Hat Fire               | 8/9/2018  | 8/16/2018  | 1900                | Shasta, CA                                     | Hwy 299 east and Fish Hatchery rd, northeast of Burney in the Fall River Mills area      | 40.993, -121.522 | California Cascades Eastside Conifer Forest                                                                                                     | Ponderosa pine, Jeffrey pine, western juniper, sagebrush                                                                                                                                                                                                                                     |
| Hirz Fire              | 8/9/2018  | 9/12/2018  | 46150               | Shasta, CA                                     | Off Gilman and Moore Creek Campground, east of Lakehead                                  | 40.896, -122.219 | Eastern Klamath Low Elevation Forests                                                                                                           | Douglas-fir, ponderosa pine, canyon live oak, knobcone pine, chaparral of chamise, deer brush, manzanita, streams, cottonwoods, white alder, and willows                                                                                                                                     |

Table S1 (Continued)

| Fire name               | Start day | End day    | Burned area (acres) | County                                         | Location                                                             | Lat/Lon          | Ecosystem                                                                                                                                          | Corresponding Vegetation                                                                                                                                                                                                                                                                                                                                                                                                                                                                                                                                                                 |
|-------------------------|-----------|------------|---------------------|------------------------------------------------|----------------------------------------------------------------------|------------------|----------------------------------------------------------------------------------------------------------------------------------------------------|------------------------------------------------------------------------------------------------------------------------------------------------------------------------------------------------------------------------------------------------------------------------------------------------------------------------------------------------------------------------------------------------------------------------------------------------------------------------------------------------------------------------------------------------------------------------------------------|
| Blue Jay Fire           | 7/24/2020 | 11/20/2020 | 6,922               | Mariposa, CA; Tuolumne, CA                     | Near Yosemite Creek Campground                                       |                  | Southern Sierra Upper Montane Forests; Southern Sierra Subalpine Forests; Sierran Alpine                                                           | Mixed conifer, white fir, red fir forests, Jeffrey pine, lodgepole pine, montane chaparral, western white pine, mountain hemlock, foxtail pine, limber pine, Cushion plants, tufted grasses, alpine willows, sedges, various shrubs, herbaceous plants, krummholz forms of high-elevation conifers, and whitebark pine                                                                                                                                                                                                                                                                   |
| Red Salmon Complex Fire | 7/27/2020 | 11/17/2020 | 144,698             | Humboldt, CA; Siskiyou, CA; Trinity, CA        | Trinity Alps Wilderness Area, 14 miles northeast of Willow Creek, CA | 41.185, -123.433 | Marble/Salmon Mountains-Trinity Alps; Western Klamath Low Elevation Forests                                                                        | Douglas-fir, white fir, red fir, Port Orford cedar, tanoak, canyon live oak, red and white alder, mixed oak                                                                                                                                                                                                                                                                                                                                                                                                                                                                              |
| Wolf Fire               | 8/11/2020 | 11/19/2020 | 2,057               | Tuolumne, CA                                   | East of White Wolf (Yosemite)                                        | 34.609, -119.365 | Southern Sierra Mid-Montane Forests; Southern Sierra Upper Montane Forests; Southern Sierra Subalpine Forests                                      | Ponderosa pine forests, mixed conifer forest, Jeffrey pine, giant sequoia, white fir, red fir forests, lodgepole pine, montane chaparral, whitebark pine, western white pine, mountain hemlock, foxtail pine, and limber pine                                                                                                                                                                                                                                                                                                                                                            |
| Lake Fire               | 8/12/2020 | 9/28/2020  | 31,089              | Los Angeles, CA                                | Lake Hughes Rd and Prospect Rd, southwest Lake Hughes                | 34.679, -118.452 | Southern California Lower Montane Shrub and Woodland                                                                                               | Chaparral, bigcone Douglas-fir, canyon live oak, coastal sage scrub                                                                                                                                                                                                                                                                                                                                                                                                                                                                                                                      |
| Ranch 2 Fire            | 8/13/2020 | 10/5/2020  | 4,237               | Los Angeles, CA                                | North San Gabriel Canyon Rd and Ranch Rd, San Gabriel Canyon         | 34.160, -117.910 | Los Angeles Plain                                                                                                                                  | California sagebrush, California buckwheat, coast live oak, chamise chaparral, and annual grasslands                                                                                                                                                                                                                                                                                                                                                                                                                                                                                     |
| Loyalton Fire           | 8/14/2020 | 9/14/2020  | 47,029              | Lassen, CA; Plumas, CA; Sierra, CA; Washoe, NV | Mount Ina Coolbrith East of Loyalton in Sierra County                | 39.702, -120.143 | Sierra Nevada-Influenced Semiarid Hills and Basins; Northeastern Sierra Mixed Conifer-Pine Forests; Sierra Nevada-Influenced Ranges; Sierra Valley | Wyoming big sagebrush, antelope bitterbrush, desert peach, low sagebrush, Lahontan sagebrush, Douglas rabbitbrush, Nevada ephedra, bottlebrush squirreltail, desert needlegrass, Thurber needlegrass, Indian ricegrass, cheatgrass, bluebunch wheatgrass, Sandberg bluegrass, juniper, Riparian cottonwood woodland, buffaloberry, conifers, Jeffrey pine, ponderosa pine, sugar pine, incense cedar, California white fir, sagebrush, fire-maintained chaparral, snowbrush, and manzanita; pinyon-juniper woodland, lodgepole pine, western white pine, grassland, cattail, and bulrush |

Table S1 (Continued)

| Fire name                  | Start day | End day   | Burned area (acres) | County                                                                                      | Location                                                                                                                                | Lat/Lon          | Ecosystem                                                                                                                                                    | Corresponding Vegetation                                                                                                                                                                                                                                                                                                                                                                                                                                                                                                                               |
|----------------------------|-----------|-----------|---------------------|---------------------------------------------------------------------------------------------|-----------------------------------------------------------------------------------------------------------------------------------------|------------------|--------------------------------------------------------------------------------------------------------------------------------------------------------------|--------------------------------------------------------------------------------------------------------------------------------------------------------------------------------------------------------------------------------------------------------------------------------------------------------------------------------------------------------------------------------------------------------------------------------------------------------------------------------------------------------------------------------------------------------|
| Dome Fire                  | 8/15/2020 | 8/24/2020 | 43,273              | San Bernardino, CA                                                                          | In the Mojave National Preserve                                                                                                         | 35.301, -115.598 | Eastern Mojave Basins; Eastern Mojave Low Ranges and Arid Footslopes                                                                                         | Mesquite, acacia, smoke tree, Creosotebush, white bursage, galleta grass, Desert willow, coyote willow; blackbrush, Mojave Desert forbs, shrubs, succulent species including Joshua tree, yucca species, and cacti                                                                                                                                                                                                                                                                                                                                     |
| Elk Fire                   | 8/16/2020 | 8/17/2020 | 727                 | Glenn, CA                                                                                   | West of Willows                                                                                                                         | 39.524, -122.427 | North Valley Alluvium                                                                                                                                        | Annual grasslands, blue oaks, and valley oaks                                                                                                                                                                                                                                                                                                                                                                                                                                                                                                          |
| Crane Fire                 | 8/16/2020 | 8/31/2020 | 2,993               | Lake, OR                                                                                    | On Crane Mountain, near Crane Creek, 10 miles southeast of Lakeview                                                                     | 42.094, -120.269 | Fremont Pine/Fir Forest                                                                                                                                      | Ponderosa pine and western juniper, white fir, whitebark pine, lodgepole pine, snowberry, heartleaf arnica, Wheeler bluegrass, Antelope bitterbrush, and longstolon sedge                                                                                                                                                                                                                                                                                                                                                                              |
| River Fire                 | 8/16/2020 | 9/4/2020  | 48,088              | Monterey, CA                                                                                | Pine Canyon and River Rd, east of Salinas                                                                                               | 36.602, -121.621 | Northern Santa Lucia Range; Monterey Bay Plains and Terraces                                                                                                 | Coast live oak, California sagebrush-black sage, chamise and live oak shrublands, Douglas-fir, tanoak, redwood; California oatgrass, herbaceous communities, coastal scrub, sage, pickleweed, cropland, artichokes, strawberries, and lettuce                                                                                                                                                                                                                                                                                                          |
| CZU Lightning Complex Fire | 8/16/2020 | 9/22/2020 | 86,509              | San Mateo, CA; Santa Cruz, CA                                                               | Various locations across San Mateo and Santa Cruz Counties                                                                              | 37.171, -122.223 | Santa Cruz Mountains; San Mateo Coastal Hills                                                                                                                | Redwood, Douglas-fir, tanoak, coast live oak, California bay, chaparral, coastal scrub, Santa Cruz cypress, Shreve oak, and cropland                                                                                                                                                                                                                                                                                                                                                                                                                   |
| SCU Lightning Complex Fire | 8/16/2020 | 10/1/2020 | 396,624             | Santa Clara, CA; Alameda, CA; Contra Costa, CA; San Joaquin, CA; Merced, CA; Stanislaus, CA | Multiple locations throughout Santa Clara County, Alameda County, Contra Costa County, San Joaquin County, Merced and Stanislaus County | 37.439, -121.304 | Diablo Range; East Bay Hills/Western Diablo Range; Eastern Hills; Westside Alluvial Fans and Terraces; Livermore Hills and Valleys; Delta; San Joaquin Basin | Blue oak woodlands, savannas, chamise, leather oak, mixed chaparral shrublands, sargent cypress, black oak, mixed conifers, Jeffrey pine, coast live oak, valley oak, chamise, eucalyptus, flammable exotic vegetation, needlegrass, annual grasslands, agricultural land, perennial, bladderpod, ephedra shrublands, coastal live oak, corn, alfalfa, wheat, aquatic plants, tules, cattails, rushes, cropland, hay/pasture land, alfalfa, tomatoes, emergent aquatics, cottonwood, willow, saltgrass, alkali sacaton, creeping wildrye, and allscale |

Table S1 (Continued)

| Fire name           | Start day | End day    | Burned area (acres) | County                                                                  | Location                                                                                                                                                                                         | Lat/Lon          | Ecosystem                                                                                                                                          | Corresponding Vegetation                                                                                                                                                                                                                                                                                                                                                                                                                                                                                                                                            |
|---------------------|-----------|------------|---------------------|-------------------------------------------------------------------------|--------------------------------------------------------------------------------------------------------------------------------------------------------------------------------------------------|------------------|----------------------------------------------------------------------------------------------------------------------------------------------------|---------------------------------------------------------------------------------------------------------------------------------------------------------------------------------------------------------------------------------------------------------------------------------------------------------------------------------------------------------------------------------------------------------------------------------------------------------------------------------------------------------------------------------------------------------------------|
| Beachie Creek Fire  | 8/16/2020 | 10/28/2020 | 193,573             | Clackamas, OR; Linn, OR; Marion, OR                                     | In the Opal Creek Wilderness about six miles northwest of Detroit Lake in Oregon, about 38 miles east of Salem, approximately two miles south of Jawbone Flats on the Willamette National Forest |                  | Valley Foothills; Western Cascades Lowlands and Valleys; Western Cascades Montane Highlands                                                        | Oak savanna, prairies, California oatgrass, fescue, blue wildrye, brodiaea, prairie forbs, Douglas-fir forests, sword fern, oceanspray, hazel, baldhip rose, poison oak, and alien Himalayan blackberry; western hemlock, western redcedar, bigleaf maple, red alder, vine maple, salal, rhododendron, Oregon grape, huckleberry, thimbleberry, oxalis, hazel, Pacific silver fir, mountain hemlock, noble fir, bigleaf maple, and Pacific yew.                                                                                                                     |
| August Complex Fire | 8/16/2020 | 11/12/2020 | 1,032,648           | Glenn, CA; Lake, CA; Mendocino, CA; Tehama, CA; Trinity, CA; Shasta, CA | Mendocino National Forest, with portions spilling over to the Shasta-Trinity National Forest and Six Rivers National Forest in the north, as well as private land surrounding the forests.       | 39.765, -122.673 | High North Coast Ranges; Outer North Coast Ranges; North Coast Range Eastern Slopes; Foothill Ridges and Valleys; Eastern Klamath Montane Forests; | Mixed conifer, Douglas-fir forests, tanoak, white fir forest, red fir, Oregon white oak, needlegrass grasslands, redwood, leather oak, chamise, mixed conifer, McNab or Sargent cypress, knobcone pine, blue oak woodland, purple needlegrass, foothill pine, incense cedar, ponderosa pine, sugar pine, mountain dogwood, Shasta fir, black oak, canyon live oaks, huckleberry oak and chaparral                                                                                                                                                                   |
| Lionshead Fire      | 8/16/2020 | 11/13/2020 | 204,469             | Jefferson, OR; Linn, OR; Marion, OR; Wasco, OR                          | 14 miles west of the Warm Springs community                                                                                                                                                      |                  | Western Cascades Lowlands and Valleys; Western Cascades Montane Highlands; Cascades Subalpine/Alpine; Ponderosa Pine/Bitterbrush Woodland          | Douglas-fir, western hemlock, western redcedar, bigleaf maple, red alder, vine maple, salal, rhododendron, Oregon grape, huckleberry, thimbleberry, swordfern, oxalis, hazel, and blackberry; Pacific silver fir, mountain hemlock, noble fir, Pacific yew; Herbaceous and shrubby subalpine meadow vegetation, whitebark pine, and subalpine fir, Brewer's sedge, Holm's sedge, black alpine sedge, tufted hairgrass, and alpine aster; Ponderosa pine, antelope bitterbrush, greenleaf manzanita, snowberry, mountain alder, stream dogwood, willows, and sedges. |
| Jones Fire          | 8/17/2020 | 8/28/2020  | 705                 | Nevada, CA                                                              | Jones Bar Rd, Yuba River Drainage, northwest of Nevada City                                                                                                                                      | 39.292, -121.100 | Northern Sierra Lower Montane Forests; Northern Sierra Mid-Montane Forests; Northern Sierran Foothills                                             | Montane hardwood, montane hardwood-conifer, mixed conifer forests, Douglas-fir, canyon live oak, interior live oak, black oak, tanoak, white fir, ponderosa pine, Jeffrey pine, needlegrass, annual grasslands, chamise, manzanita, ceanothus, blue oak, and foothill pine                                                                                                                                                                                                                                                                                          |

Table S1 (Continued)

| Fire name                  | Start day | End day   | Burned area (acres) | County                                               | Location                                                                             | Lat/Lon          | Ecosystem                                                                                                                                                                      | Corresponding Vegetation                                                                                                                                                                                                                                                                                                                                                                                                                                                                                                                                                                                                  |
|----------------------------|-----------|-----------|---------------------|------------------------------------------------------|--------------------------------------------------------------------------------------|------------------|--------------------------------------------------------------------------------------------------------------------------------------------------------------------------------|---------------------------------------------------------------------------------------------------------------------------------------------------------------------------------------------------------------------------------------------------------------------------------------------------------------------------------------------------------------------------------------------------------------------------------------------------------------------------------------------------------------------------------------------------------------------------------------------------------------------------|
| Holser Fire                | 8/17/2020 | 9/6/2020  | 3,000               | Ventura, CA                                          | Holser Canyon Rd and Piru Canyon Rd, south of Lake Piru                              | 34.439, -118.759 | Venturan-Angeleno Coastal Hills; Oxnard Plain and Valleys                                                                                                                      | Annual grassland, California sagebrush, California buckwheat, mixed sage scrub, chamise chaparral, mixed chaparral, and coast live oak; brome and needlegrass grasslands, cropland, citrus orchards                                                                                                                                                                                                                                                                                                                                                                                                                       |
| Sheep Fire                 | 8/17/2020 | 9/9/2020  | 29,570              | Plumas, CA                                           | Hennigan's Sheep Camp, PNF; Gold Run Road, Southwest of Susanville in Plumas County. | 40.274, -120.757 | Northeastern Sierra Mixed Conifer-Pine Forests; Northern Sierra Upper Montane Forests; Sierra Nevada-Influenced Semiarid Hills and Basins; Northern Sierra Mid-Montane Forests | Mix of conifers, Jeffrey pine, ponderosa pine, sugar pine, incense cedar, California white fir, sagebrush, antelope bitterbrush, fire-maintained chaparral, snowbrush, manzanita, red fir, white fir, lodgepole pine, quaking aspen, montane chaparral, Wyoming big sagebrush, desert peach, low sagebrush, Lahontan sagebrush, Douglas rabbitbrush, Nevada ephedra, bottlebrush squirreltail, desert needlegrass, Thurber needlegrass, Indian ricegrass, cheatgrass, bluebunch wheatgrass, Sandberg bluegrass, juniper, Riparian cottonwood woodland, buffaloberry, Douglas-fir, black oak, tanoaks, and canyon live oak |
| LNU Lightning Complex Fire | 8/17/2020 | 10/2/2020 | 363,220             | Lake, CA; Napa, CA; Sonoma, CA; Solano, CA; Yolo, CA | Around Lake Berryessa                                                                | 38.482, -122.149 | Foothill Ridges and Valleys; North Coast Range Eastern Slopes; Western Valley Foothills/Dunnigan Hills; Napa-Sonoma-Lake Volcanic Highlands; Yolo Alluvial Fans                | Purple needlegrass, chamise, foothill pine, leather oak, chamise, mixed conifer, McNab or Sargent cypress, knobcone pine, blue oak woodland, needlegrass grasslands, mixed chaparral, mixed hardwoods, coast live oak, madrone, California bay, Douglas-fir, Douglas pine, cypress, grasslands, valley oak, cottonwoods, willows, cropland, pastureland, alfalfa, winter wheat, sunflowers, corn, tomatoes, strawberries, stonefruit, walnut, and almond orchards                                                                                                                                                         |
| North Complex Fire         | 8/17/2020 | 12/3/2020 | 318,935             | Plumas, CA; Butte, CA                                | in the Plumas National Forest, east of Lake Oroville                                 | 40.091, -120.931 | Northern Sierra Lower Montane Forests; Northern Sierra Mid-Montane Forests; Northern Sierran Foothills; Northern Sierra Upper Montane Forests                                  | Montane hardwood, montane hardwood-conifer, mixed conifer forests, Douglas-fir, canyon live oak, interior live oak, black oak, tanoak, white fir, ponderosa pine, Jeffrey pine, needlegrass grassland, annual grassland, chamise, manzanita, ceanothus, blue oak, foothill pine, red fir, white fir, sugar pine, incense cedar, lodgepole pine, quaking aspen, and montane chaparral                                                                                                                                                                                                                                      |



Table S1 (Continued)

| Fire name                  | Start day | End day    | Burned area (acres) | County        | Location                                                                | Lat/Lon          | Ecosystem                                                                                                                                | Corresponding Vegetation                                                                                                                                                                                                                                                                                                                                                         |
|----------------------------|-----------|------------|---------------------|---------------|-------------------------------------------------------------------------|------------------|------------------------------------------------------------------------------------------------------------------------------------------|----------------------------------------------------------------------------------------------------------------------------------------------------------------------------------------------------------------------------------------------------------------------------------------------------------------------------------------------------------------------------------|
| Salt Fire                  | 8/18/2020 | 8/24/2020  | 1,789               | Calaveras, CA | Salt Springs Valley Reservoir                                           | 38.028, -120.763 | Northern Sierran Foothills                                                                                                               | Needlegrass, annual grasslands, chamise, manzanita, interior live oak, ceanothus, blue oak, and foothill pine                                                                                                                                                                                                                                                                    |
| Carmel Fire                | 8/18/2020 | 9/4/2020   | 6,905               | Monterey, CA  | Cachagua Rd and Carmel Valley Rd, South of Carmel                       | 36.446, -121.682 | Northern Santa Lucia Range                                                                                                               | Coast live oak, California sagebrush-black sage, canyon live oak, chamise and live oak shrublands, Douglas-fir, tanoak, and redwood                                                                                                                                                                                                                                              |
| W-5 Cold Spring Fire       | 8/18/2020 | 9/14/2020  | 84,817              | Lassen, CA    | Cold Spring Road, West of Cold Spring Mountain                          | 41.028, -120.281 | Modoc/Lassen Juniper-Shrub Hills and Mountains; Warner Mountains; High Elevation Warner Mountains; High Lava Plains; Pluvial Lake Basins | Western juniper, big sagebrush, perennial bunchgrasses, Jeffrey pine, ponderosa pine, white fir, low sagebrush, perennial bunchgrasses, Washoe pine, aspen, lodgepole pine, whitebark pine, Drought-tolerant alpine cushion plants, bluebunch wheatgrass, Wyoming big sagebrush, cheatgrass, greasewood, inland saltgrass, seepweed, basin big sagebrush, and associated grasses |
| Woodward Fire              | 8/18/2020 | 10/1/2020  | 4,929               | Marin, CA     | Woodward Valley Trail, East of Olema                                    | 38.018, -122.836 | Marin Hills; Coastal Franciscan Redwood Forest                                                                                           | Coast live oak, annual grasslands, coastal scrub, tanoak, Douglas-fir, multi-story canopy of redwood, bigleaf maple, evergreen shrubs, various grasses, and grassland savannas                                                                                                                                                                                                   |
| Dolan Fire                 | 8/18/2020 | 12/31/2020 | 128,050             | Monterey, CA  | In the Big Sur region and other parts of the Santa Lucia Mountain range | 36.123, -121.602 | Santa Lucia Coastal Forest and Woodland; Northern Santa Lucia Range                                                                      | Douglas-fir, tanoak, redwoods, shrub; Coast live oak, California sagebrush-black sage, Canyon live oak, chamise                                                                                                                                                                                                                                                                  |
| SQF Lightning Complex Fire | 8/19/2020 | 1/5/2021   | 174,178             | Tulare, CA    | 25 miles north of Kernville, CA                                         | 36.255, -118.497 | Southern Sierran Foothills; Southern Hardpan Terraces                                                                                    | Blue oak, needlegrass, annual grasslands, chamise, ceanothus, mixed oaks, ceanothus shrublands, blue oak savannas, and foothill pine                                                                                                                                                                                                                                             |
| Moc Fire                   | 8/20/2020 | 8/30/2020  | 2,857               | Tuolumne, CA  | West of Groveland; Hwy 49 and Hwy 120, Moccasin                         | 37.814, -120.312 | Northern Sierran Foothills; Central Sierra Lower Montane Forests                                                                         | Needlegrass grassland, annual grassland, chamise, manzanita, interior live oak, ceanothus, blue oak, foothill pine, ponderosa pine, gray pine, mixed conifer forest, Montane hardwood forests, canyon live oak, black oak, shrubby tanoak, mixed chaparral, and other shrubs                                                                                                     |

Table S1 (Continued)

| Fire name      | Start day | End day    | Burned area (acres) | County                               | Location                                                                                                             | Lat/Lon               | Ecosystem                                                                                                                                                                        | Corresponding Vegetation                                                                                                                                                                                                                                                                                                                                                                                                     |
|----------------|-----------|------------|---------------------|--------------------------------------|----------------------------------------------------------------------------------------------------------------------|-----------------------|----------------------------------------------------------------------------------------------------------------------------------------------------------------------------------|------------------------------------------------------------------------------------------------------------------------------------------------------------------------------------------------------------------------------------------------------------------------------------------------------------------------------------------------------------------------------------------------------------------------------|
| Slink Fire     | 8/29/2020 | 11/8/2020  | 26,759              | Alpine, CA;<br>Mono, CA              | Slinkard Valley, west of Coleville                                                                                   | 38.568, -<br>119.568  | Northeastern Sierra Mixed Conifer-Pine Forests; Sierran Alpine; Northern Sierra Subalpine Forests                                                                                | Mid-elevation dry forests, mix of conifers, Jeffrey pine, ponderosa pine, sugar pine, incense cedar, California white fir, sagebrush, antelope bitterbrush, fire-maintained chaparral, snowbrush, manzanita, Cushion plants, tufted grasses, alpine willows, sedges, various shrubs, herbaceous plants, krummholz forms of high-elevation conifers, whitebark pine, lodgepole pine, western white pine, and mountain hemlock |
| Creek Fire     | 9/4/2020  | 12/24/2020 | 379,895             | Fresno, CA;<br>Madera, CA            | Both sides of the San Joaquin River near Mammoth Pool, Shaver Lake, Big Creek and Huntington Lake                    | 37.1915, -<br>119.261 | Southern Sierra Mid-Montane Forests; Southern Sierra Lower Montane Forest and Woodland; Southern Sierra Upper Montane Forests; Southern Sierra Subalpine Forests; Sierran Alpine | Ponderosa pine forests, mixed conifer forest, Jeffrey pine, giant sequoia, oak, chaparral, white fir, red fir forests, lodgepole pine, montane chaparral, western white pine, mountain hemlock, foxtail pine, limber pine, Cushion plants, tufted grasses, alpine willows, sedges, various shrubs, herbaceous plants, krummholz forms of high-elevation conifers, and whitebark pine                                         |
| El Dorado Fire | 9/5/2020  | 11/16/2020 | 22,744              | San Bernardino, CA;<br>Riverside, CA | In El Dorado Ranch Park, and quickly spread to the San Geronio Wilderness Area of the San Bernardino National Forest | 34.058, -<br>116.989  | Inland Hills; Inland Valleys; Southern California Lower Montane Shrub and Woodland; Southern California Montane Conifer Forest                                                   | Sage scrub, grassland, and chaparral; riparian woodlands, cropland; mixed evergreen woodland, bigcone Douglas-fir, canyon live oak, shrubs such as California buckwheat, are ubiquitous; mixed coniferous forest with ponderosa pine, Jeffrey pine, sugar pine, white fir, incense cedar, hardwoods such as black oak                                                                                                        |
| Bobcat Fire    | 9/6/2020  | 12/18/2020 | 115,997             | Los Angeles, CA                      | In the central San Gabriel Mountains, in and around the Angeles National Forest                                      | 34.241, -<br>117.868  | Southern California Lower Montane Shrub and Woodland                                                                                                                             | Chaparral, mixed evergreen woodland, bigcone Douglas-fir, canyon live oak, coastal sage scrub                                                                                                                                                                                                                                                                                                                                |

Table S1 (Continued)

| Fire name                  | Start day | End day    | Burned area (acres) | County      | Location                                                                       | Lat/Lon          | Ecosystem                                                     | Corresponding Vegetation                                                                                                                                                                                                                                                                                                                                                                                                                                                                                                                              |
|----------------------------|-----------|------------|---------------------|-------------|--------------------------------------------------------------------------------|------------------|---------------------------------------------------------------|-------------------------------------------------------------------------------------------------------------------------------------------------------------------------------------------------------------------------------------------------------------------------------------------------------------------------------------------------------------------------------------------------------------------------------------------------------------------------------------------------------------------------------------------------------|
| Echo Mountain Complex Fire | 9/7/2020  | 9/21/2020  | 2,552               | Lincoln, OR | 4 miles east of Lincoln City, Oregon                                           | 45.015, -123.903 | Coastal Lowlands; Coastal Uplands; Volcanics                  | Sitka spruce, western hemlock, Douglas-fir canopy, salal, sword fern, vine maple, and Oregon grape, red alder, western redcedar, bigleaf maple, salmonberry; California bay-laurel, Baltic rush, Lyngby's sedge, tufted hairgrass, Pacific silverleaf, seaside arrowgrass, shore pine, sweet gale, and Hooker's willow, shore pine, rhododendron, evergreen blueberry shrub, dune wildrye, Chilean strawberry, and dune bentgrass; bigleaf maple, Grasslands; salal, oxalis, Roemer's fescue, thin bentgrass, California oatgrass, and diverse forbs. |
| Brattain Fire              | 9/7/2020  | 10/6/2020  | 50,951              | Lake, OR    | 8 miles South of Paisley, Oregon                                               | 42.572, -120.558 | Fremont Pine/Fir Forest; Pumice Plateau; High Desert Wetlands | Ponderosa pine, western juniper, white fir, whitebark pine, lodgepole pine, snowberry, heartleaf amica, Wheeler bluegrass, antelope bitterbrush, longstolon sedge, Idaho fescue, mountain alder, stream dogwood, willows, quaking aspen, sedges, rushes, tufted hairgrass, black greasewood, mat muhley, creeping wildrye, bluegrass, basin big sagebrush, Wyoming big sagebrush, silver sagebrush, basin wildrye, Nevada bluegrass, bluebunch wheatgrass, Thurber needlegrass, and cheatgrass                                                        |
| 242 Fire                   | 9/7/2020  | 10/10/2020 | 14,473              | Klamath, OR | Hwy 97 mp243 south to mp248, Hwy 422, Hwy 62 mp85-mp100, 1mi W/NW of Chiloquin | 42.653, -121.869 | Klamath/Goose Lake Basins; Pumice Plateau                     | Bluebunch wheatgrass, Idaho fescue, Antelope bitterbrush, mountain big sagebrush, low sagebrush, basin wildrye, basin big sagebrush, tules, cattails, and sedges; lodgepole pine, ponderosa pine, white fir, antelope bitterbrush, mountain alder, stream dogwood, willows, and quaking aspen                                                                                                                                                                                                                                                         |
| South Obenchain Fire       | 9/8/2020  | 10/3/2020  | 32,671              | Jackson, OR | 5 miles east of Eagle Point, Oregon                                            | 42.467, -122.683 | Rogue/Illinois Valleys; Oak Savanna Foothills                 | Oregon white oak, madrone, California black oak, ponderosa pine, grasslands, California fescue, snowberry, serviceberry, willow, cottonwood, grassland savanna, incense cedar, oceanspray, poison oak, Idaho fescue, California brome, roughstalk bluegrass, and ceanothus                                                                                                                                                                                                                                                                            |

Table S1 (Continued)

| Fire name         | Start day | End day    | Burned area (acres) | County        | Location                                                                            | Lat/Lon          | Ecosystem                                                                                          | Corresponding Vegetation                                                                                                                                                                                                                                                                                                                                                                          |
|-------------------|-----------|------------|---------------------|---------------|-------------------------------------------------------------------------------------|------------------|----------------------------------------------------------------------------------------------------|---------------------------------------------------------------------------------------------------------------------------------------------------------------------------------------------------------------------------------------------------------------------------------------------------------------------------------------------------------------------------------------------------|
| Thielsen Fire     | 9/8/2020  | 11/16/2020 | 9,975               | Douglas, OR   | 5 miles north of Crater Lake National Park and within 1 mile of Diamond Lake Resort | 43.160, -122.070 | High Southern Cascades Montane Forest                                                              | Mountain hemlock, lodgepole pine, Pacific silver fir, grand fir, white fir, Shasta red fir, woodrush, prince's pine, lupine, sidebells shinleaf, white bark pine, Shasta buckwheat, Newberry knotweed, and Brewer's sedge                                                                                                                                                                         |
| Archie Creek Fire | 9/8/2020  | 11/16/2020 | 131,542             | Douglas, OR   | Steamboat Springs on Hwy 138E to Glide, Oregon                                      | 43.334, -122.788 | Western Cascades Lowlands and Valleys; Umpqua Interior Foothills                                   | Western hemlock, western redcedar, bigleaf maple, red alder, vine maple, salal, rhododendron, Oregon grape, huckleberry, thimbleberry, swordfern, oxalis, hazel, blackberry, Oregon white oak, ponderosa pine, grand fir, madrone, tanoak, chinkapin, snowberry, poison oak, and oceanspray                                                                                                       |
| Riverside Fire    | 9/8/2020  | 12/3/2020  | 138,054             | Clackamas, OR | Near Riverside Campground                                                           |                  | Western Cascades Lowlands and Valleys; Western Cascades Montane Highlands                          | Douglas-fir, western hemlock, western redcedar, bigleaf maple, red alder, vine maple, salal, rhododendron, Oregon grape, huckleberry, thimbleberry, swordfern, oxalis, hazel, and blackberry; Pacific silver fir, mountain hemlock, noble fir, Pacific yew.                                                                                                                                       |
| Slater Fire       | 9/8/2020  | 11/16/2020 | 157,220             | Josephine, OR | Community of Happy Camp and Surrounding Area                                        | 41.766, -123.375 | Western Klamath Low Elevation Forests; Serpentine Siskiyou; Inland Siskiyou; Oak Savanna Foothills | Douglas-fir, Port Orford cedar, tanoak, canyon live oak, red alder, white alder, mixed oak, Jeffrey pine, incense cedar, manzanita, Idaho fescue, Lemmon needlegrass, ponderosa pine, Oregon white oak, California black oak, madrone, serviceberry, snowberry, Oregon grape, California fescue, poison oak, grassland savanna, oceanspray, California brome, roughstalk bluegrass, and ceanothus |
| Devil Fire        | 9/9/2020  | 11/16/2020 | 8,857               | Josephine, OR | Community of Happy Camp and Surrounding Area                                        | 41.766, -123.375 |                                                                                                    |                                                                                                                                                                                                                                                                                                                                                                                                   |

Table S1 (Continued)

| Fire name  | Start day | End day    | Burned area (acres) | County                 | Location                                                  | Lat/Lon          | Ecosystem                                                                                                | Corresponding Vegetation                                                                                                                                                                                                                       |
|------------|-----------|------------|---------------------|------------------------|-----------------------------------------------------------|------------------|----------------------------------------------------------------------------------------------------------|------------------------------------------------------------------------------------------------------------------------------------------------------------------------------------------------------------------------------------------------|
| Snow Fire  | 9/17/2020 | 10/6/2020  | 6,254               | Riverside, CA          | Snow Creek Road and Cottonwood Road, west of Palm Springs | 33.888, -116.683 | Upper Coachella Valley and Hills                                                                         | California fan palms, agricultural lands                                                                                                                                                                                                       |
| Zogg Fire  | 9/27/2020 | 10/13/2020 | 56,338              | Shasta, CA; Tehama, CA | Zogg Mine Road and Jenny Bird Lane, North of Igo          | 40.539, -122.566 | Foothill Ridges and Valleys; Tehama Terraces; Eastern Klamath Low Elevation Forests                      | purple needlegrass, blue oak, chamise, and foothill pine; Douglas-fir, ponderosa pine, canyon live oak, knobcone pine, chaparral of deer brush, manzanita, cottonwoods, white alder, and willows                                               |
| Glass Fire | 9/27/2020 | 10/20/2020 | 67,484              | Napa, CA; Sonoma, CA   | North Fork Crystal Springs Rd & Crystal Springs Rd        | 38.563, -122.497 | North Coast Range Eastern Slopes; Napa-Sonoma-Russian River Valleys; Napa-Sonoma-Lake Volcanic Highlands | Chaparral, grassland, blue oak, mixed conifers, leather oak, foothill pine, knobcone pine; Grape vineyards, orchards, specialty crops; mixed hardwoods (including coast live oak, madrone, and California bay), Douglas-fir or pines, cypress. |
| Pony Fire  | 10/3/2020 | 10/4/2020  | 20                  | Sacramento, CA         | Pony Brown Rd and Ione Rd, Sloughhouse                    | 38.464, -121.039 | Northern Terraces                                                                                        | Annual grass, forbs, blue oak woodlands                                                                                                                                                                                                        |

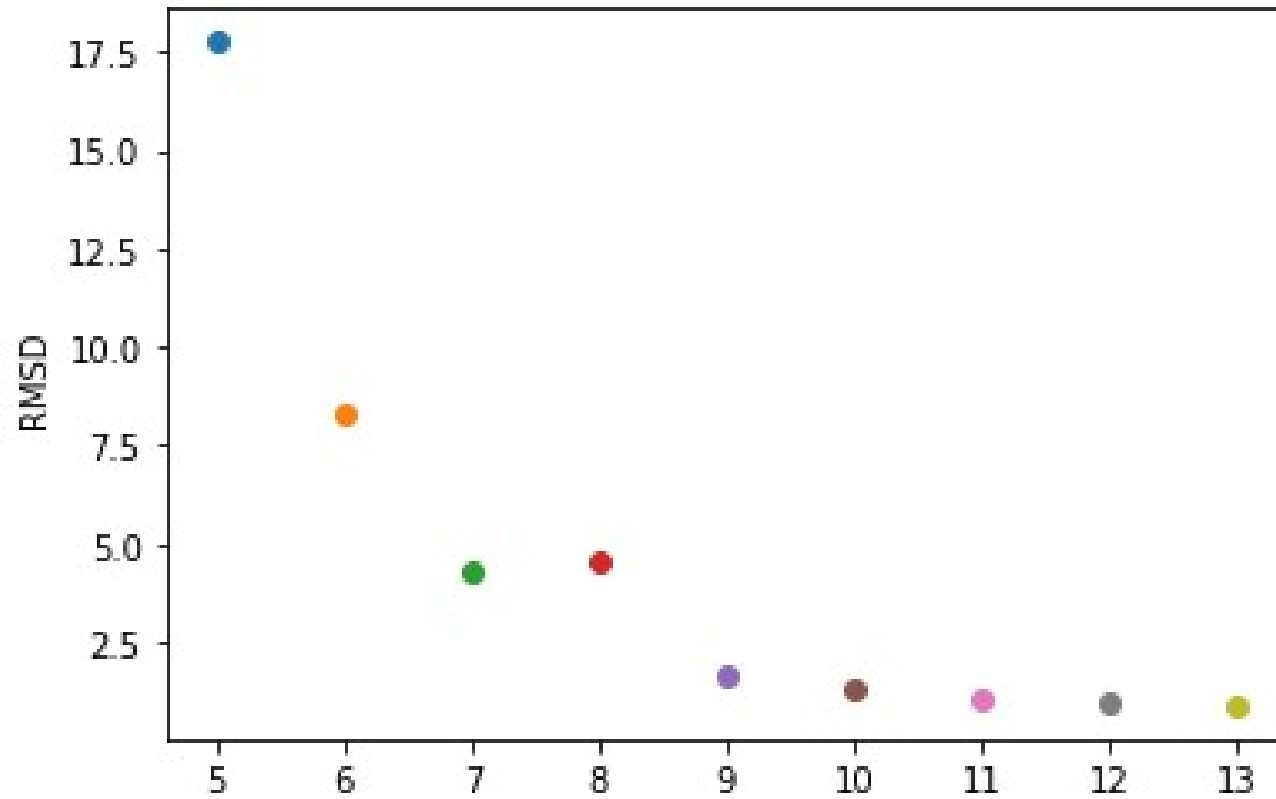

Figure S1. Root mean square deviation (RMSD) for factors from 5 to 13 on the x-axis.

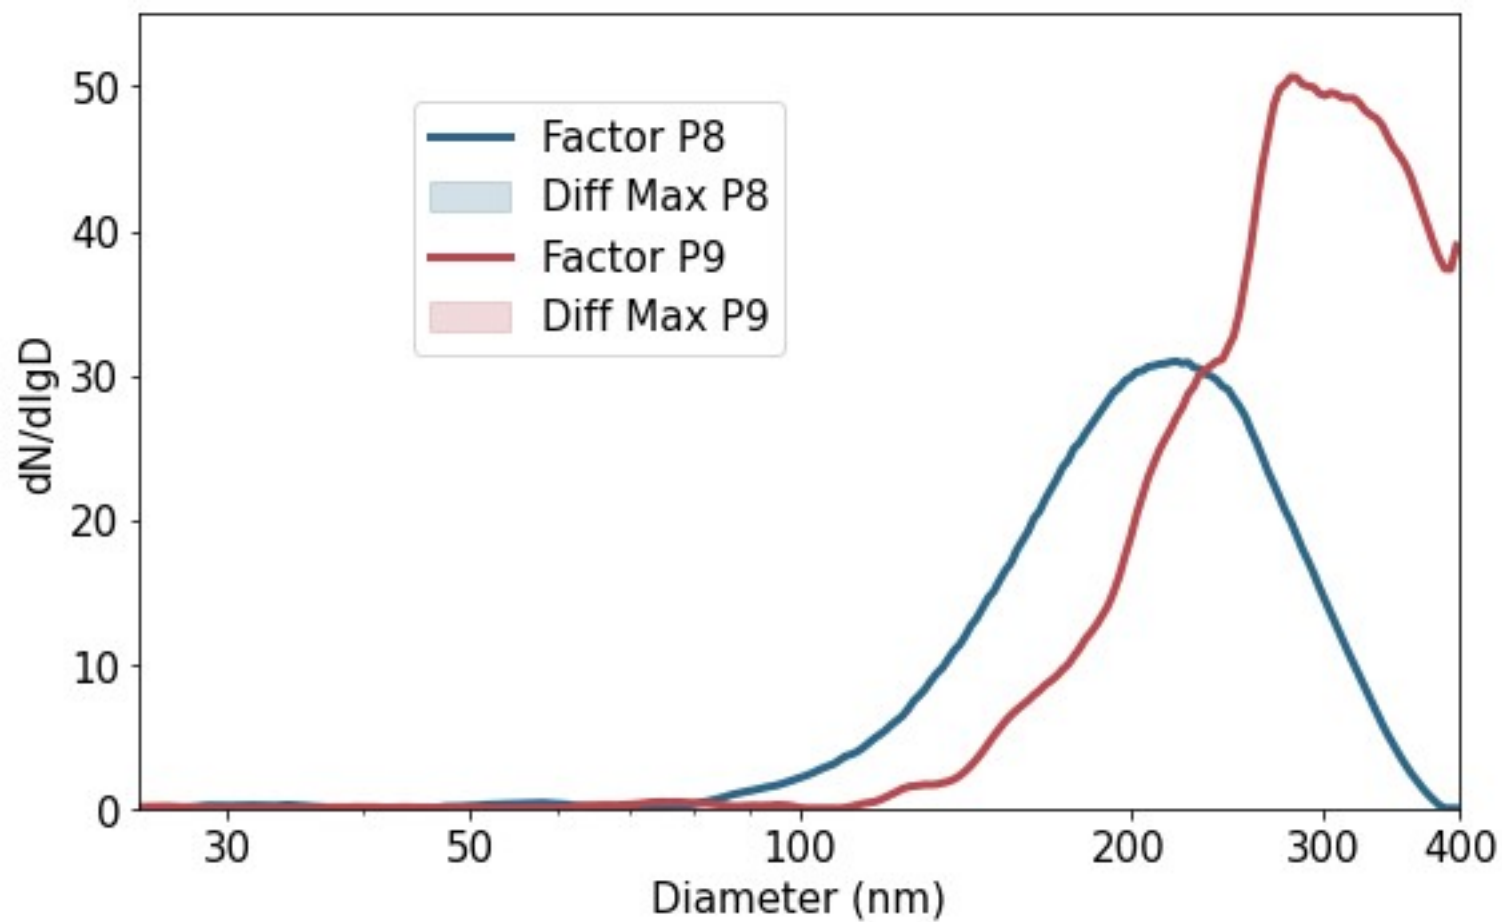

Figure S2. Sensitivity of the largest two PSD factors to 10% random perturbations of the input values. The results show the range of derived factors during 100 random simulations.

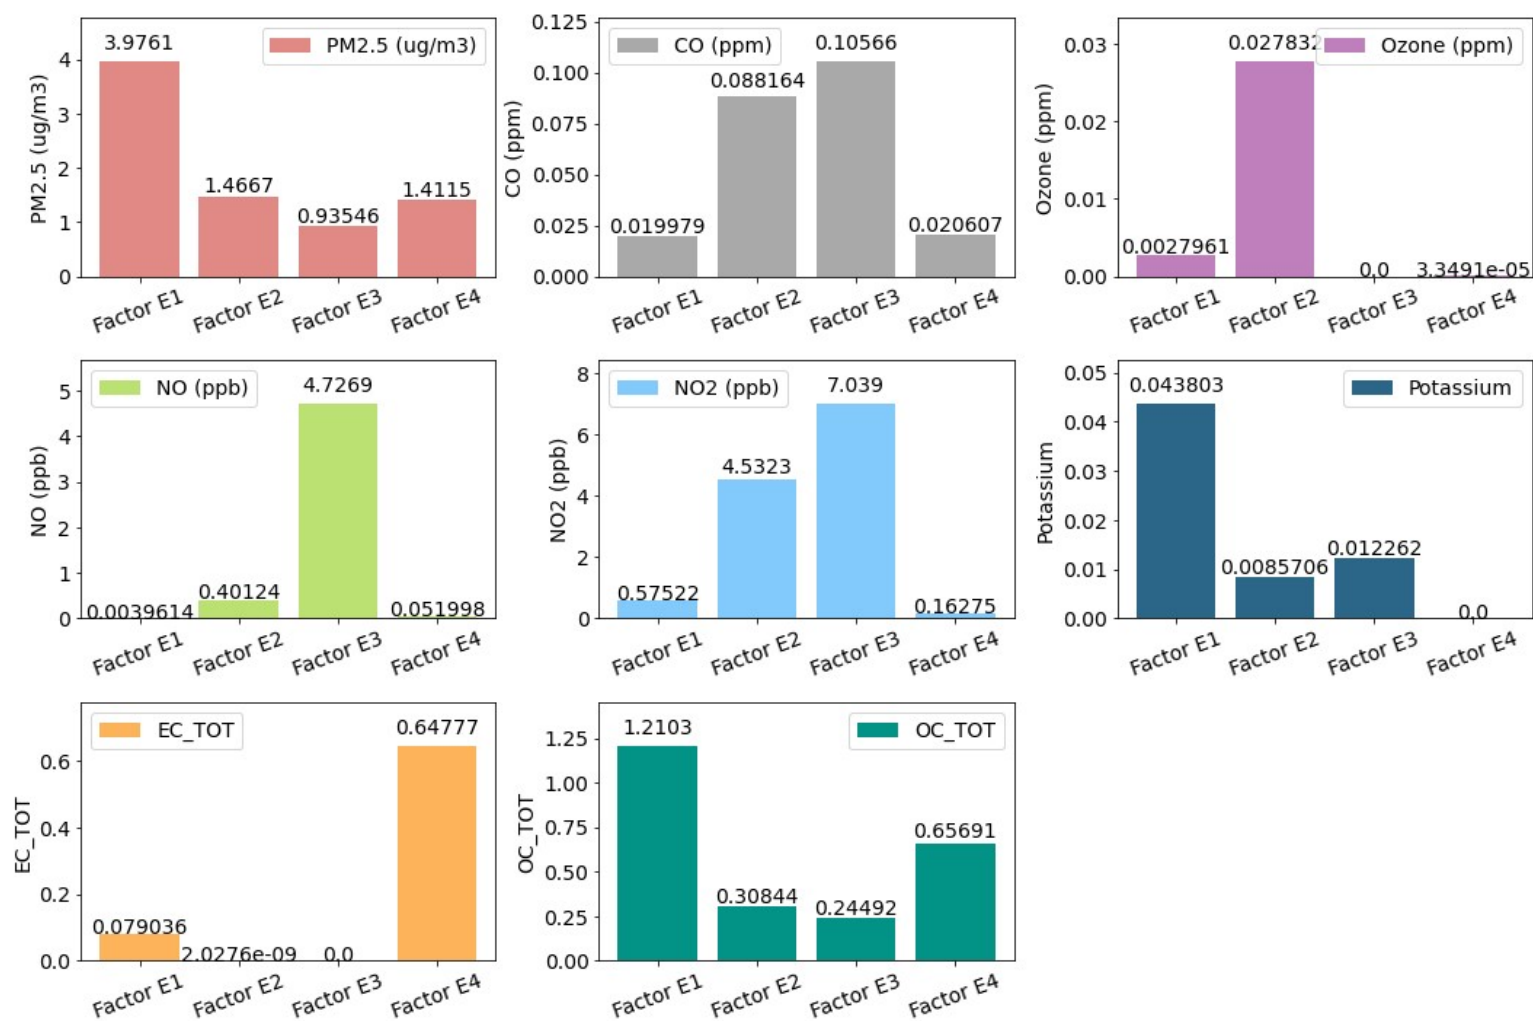

Figure S3. Detailed profile of each species from the EPA PMF.



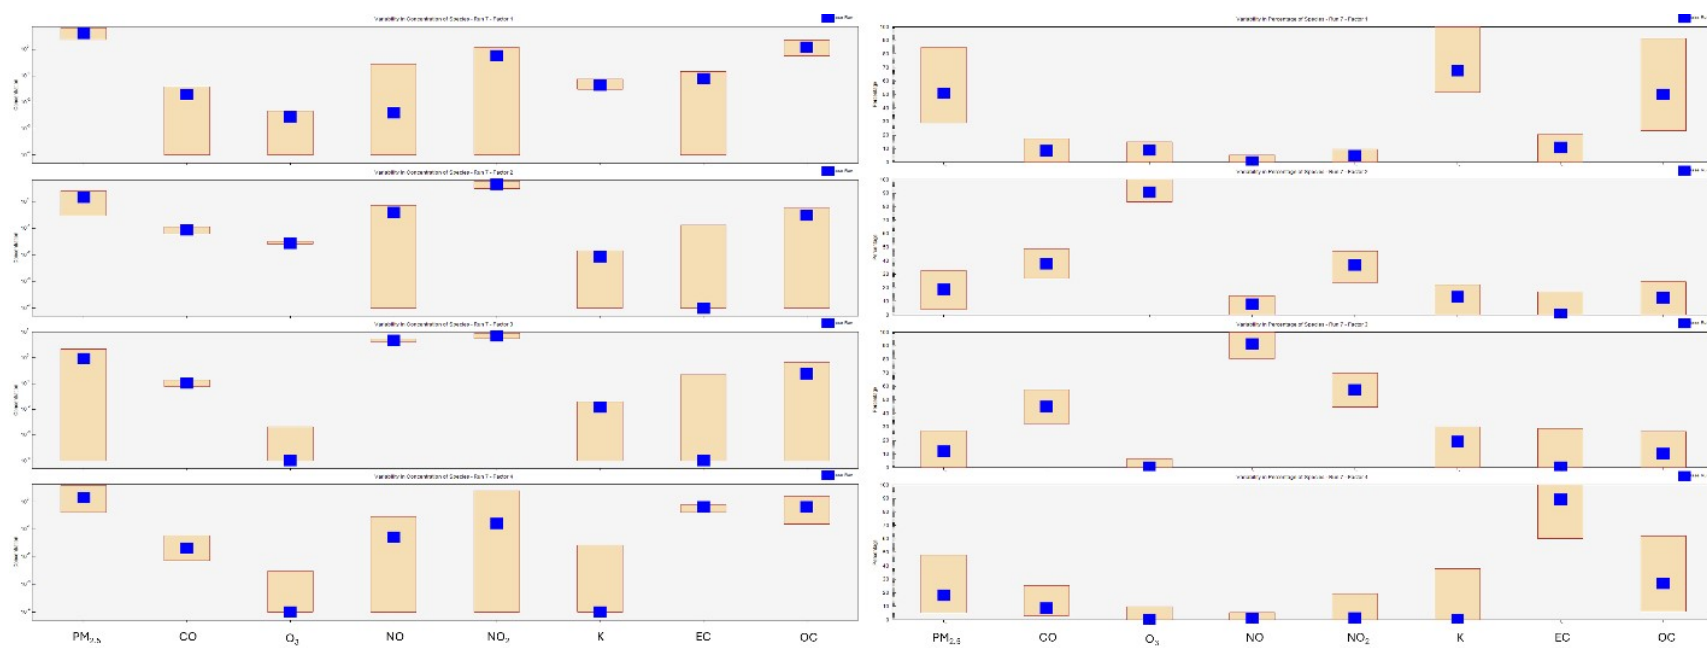

Figure S4. The variability of the selected solution from the EPA PMF was estimated through the BS-DISP error estimation analyses. The left panel shows the variability in concentration and percentage (right panel) of species from BS-DISP analysis. The blue squares represent profiles of the selected solution from the EPA PMF, and the yellow rectangles represent the ranges of variabilities.

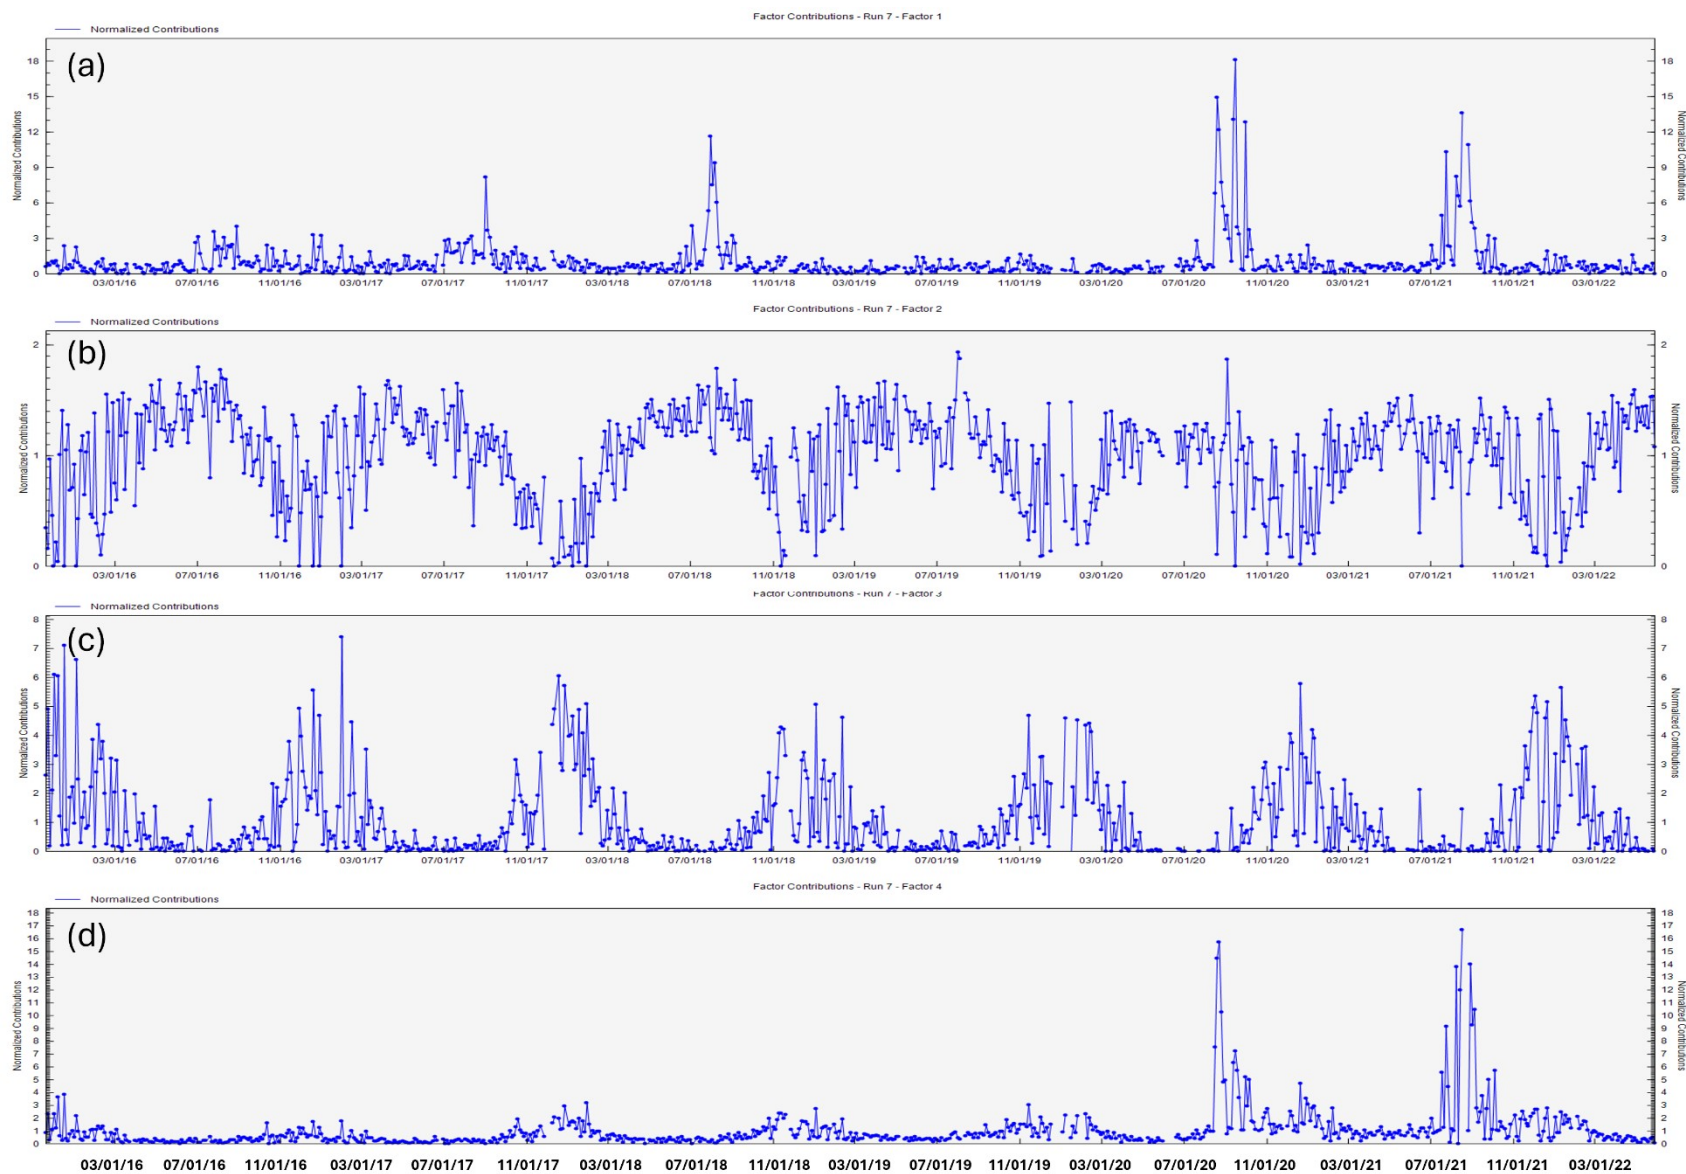

Figure S5. Contribution plot of all four factors from the EPA PMF. (a)-(d) are Factor E1-E4.

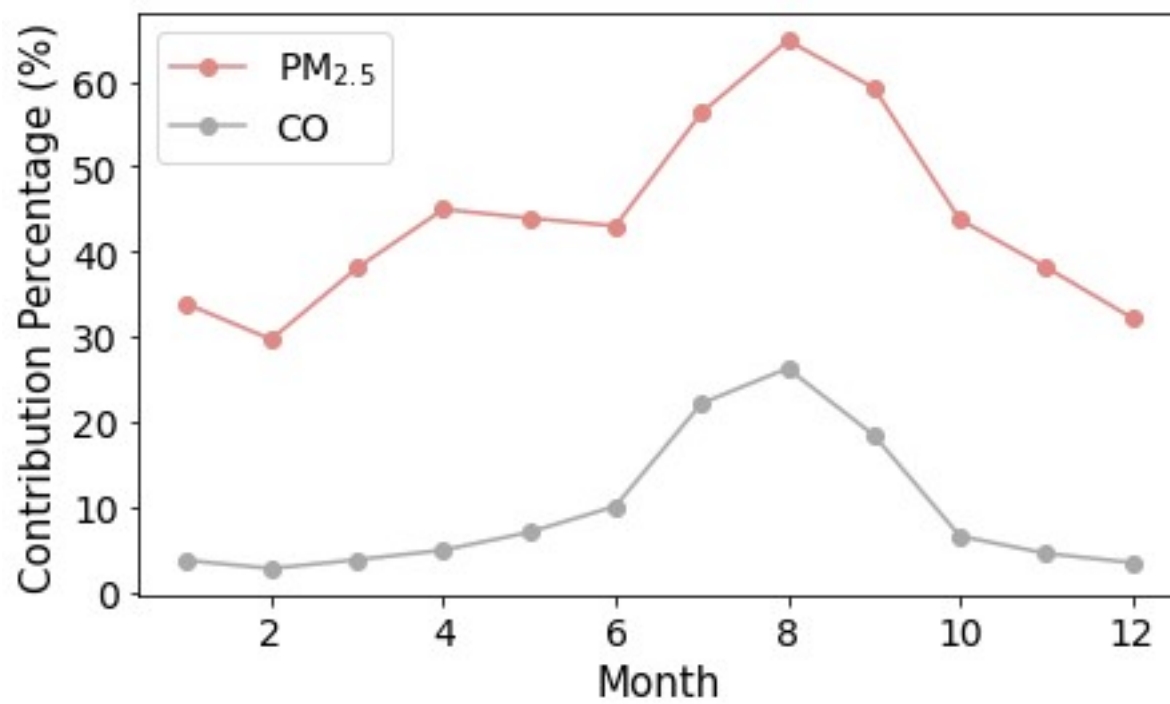

Figure S6. The monthly percentage of PM<sub>2.5</sub> and CO contribution for Factor E1 (wildfire-related factor).

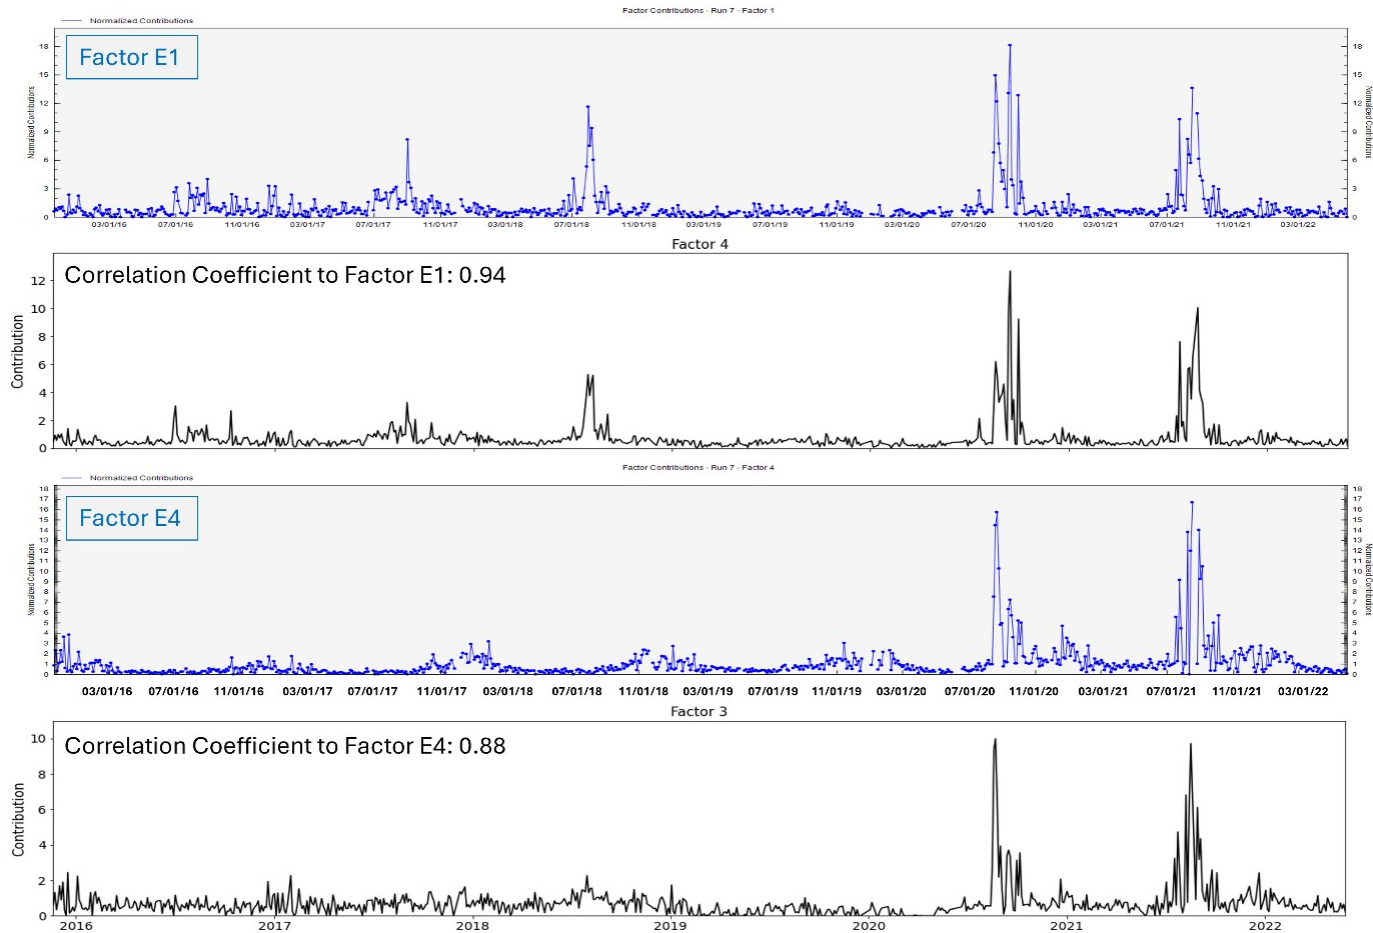

Figure S7. Comparison of fire-related factors from the EPA PMF and the Python PMF applied to the EPA data.
